# Supplementary material for: A content analysis-based approach to explore simulation verification and identify its current challenges
Source: PubMed Central journal article supplement (PMC7219780; doi:10.1371/journal.pone.0232929), 2020-05-13
Supplement: pone.0232929.s001.pdf [file pone.0232929.s001.pdf]

**S1 Supplemental.** Configuration of the Leximancer tool.

| Stage                            | Category                 | Variable                      | Setup                                          |                                 |           |
|----------------------------------|--------------------------|-------------------------------|------------------------------------------------|---------------------------------|-----------|
| Generate Concept Seeds           | Text Processing Settings | Sentence per Block            | 2 (normal)                                     |                                 |           |
|                                  |                          | Prose test threshold          | 1 (default)                                    |                                 |           |
|                                  |                          | Duplicate Text Sensitivity    | Off                                            |                                 |           |
|                                  |                          | Identify name-like concepts   | TRUE                                           |                                 |           |
|                                  |                          | Break at paragraph            | TRUE                                           |                                 |           |
|                                  |                          | Auto-paragraphing             | TRUE                                           |                                 |           |
|                                  |                          | Merge word variants           | FALSE                                          |                                 |           |
|                                  |                          | Apply folder tags             | TRUE                                           |                                 |           |
|                                  |                          | Apply file tags               | FALSE                                          |                                 |           |
|                                  |                          | Apply dialog tags             | FALSE                                          |                                 |           |
|                                  |                          | File preparation              | All Files                                      |                                 |           |
|                                  |                          | Processed File Storage Format | FastInfoSet Binary XML                         |                                 |           |
|                                  |                          | Concept seeds identification  |                                                | Automatically Identify Concepts | TRUE      |
|                                  |                          |                               |                                                | Total Number of Concepts        | Automatic |
| Percentage of Name-Like Concepts | Automatic                |                               |                                                |                                 |           |
| Concept Specificity              | FALSE                    |                               |                                                |                                 |           |
| Boilerplate Cutoff               | Stronger                 |                               |                                                |                                 |           |
| Generate Thesaurus               | Concept Seeds            | Auto concepts                 | TRUE                                           |                                 |           |
|                                  |                          | User Defined Concepts         | **                                             |                                 |           |
|                                  | Thesaurus settings       |                               | Learn concept thesaurus using source documents | TRUE                            |           |
|                                  |                          |                               | Learn once                                     | FALSE                           |           |
|                                  |                          |                               | Concept generality                             | 12 (default)                    |           |
|                                  |                          |                               | Learn from tags                                | FALSE                           |           |
|                                  |                          |                               | Learning type                                  | Normal                          |           |
|                                  |                          |                               | Sampling                                       | Automatic                       |           |
|                                  |                          |                               | Phrase separation                              | 3                               |           |
|                                  |                          |                               | Sentiment lens                                 | FALSE                           |           |
|                                  |                          |                               | Number to discovery                            | Off                             |           |
| Themed discovery                 | Concepts in Any          |                               |                                                |                                 |           |
| Only discover name-like concepts | FALSE                    |                               |                                                |                                 |           |
