# Supplementary material for: A content analysis-based approach to explore simulation verification and identify its current challenges
Source: PubMed Central journal article supplement (PMC7219780; doi:10.1371/journal.pone.0232929), 2020-05-13
Supplement: pone.0232929.s002.pdf [file pone.0232929.s002.pdf]

**S2 Supplemental.** Ranked concept list obtained from the Verification Corpus.

The 102 concepts identified from the Verification Corpus as a whole organized by decade. Values shown are concept prominences. Each publication is tagged with decade in which it was published to allow for the calculation of its prominence in each decade (six times total) within the analysis.

The large number of publications comprising the Verification Corpus gives the appearance that prominence values are always very low; however, this is expected since the size of the Corpus directly affects the calculation of prominence.

| <b>Concept Name</b> | <b>FOLDER1_1960s</b> | <b>FOLDER1_1970s</b> | <b>FOLDER1_1980s</b> |
|---------------------|----------------------|----------------------|----------------------|
| <b>activities</b>   | 1.3303621            | 0.5339414            | 0.7105835            |
| <b>agent</b>        | 0.11461797           | 0.012048136          | 0.050187666          |
| <b>algorithm</b>    | 0.30612117           | 0.8044526            | 0.5483495            |
| <b>analysis</b>     | 0.47738272           | 0.8679344            | 1.0261527            |
| <b>application</b>  | 0.47517502           | 0.4767792            | 0.7084508            |
| <b>approach</b>     | 0.2863853            | 0.5140762            | 0.7234573            |
| <b>architecture</b> | 0.061507545          | 0.025861604          | 0.3035999            |
| <b>area</b>         | 0.46837336           | 1.1586245            | 0.8240736            |
| <b>average</b>      | 0.6488401            | 1.2807046            | 0.8178838            |
| <b>behavior</b>     | 0.7748409            | 0.5194221            | 1.0859251            |
| <b>capabilities</b> | 0.15069817           | 0.43086773           | 0.5662804            |
| <b>capacity</b>     | 0.8007644            | 0.85703224           | 0.6983621            |
| <b>case</b>         | 0.7282358            | 0.82502735           | 0.62808096           |
| <b>code</b>         | 0.09867709           | 0.407985             | 1.1155429            |
| <b>complex</b>      | 0.5801644            | 0.748635             | 0.7788314            |
| <b>component</b>    | 0.45440662           | 0.4389236            | 0.7303736            |
| <b>computer</b>     | 5.637897             | 2.640339             | 1.8592498            |
| <b>control</b>      | 1.4314673            | 1.234154             | 1.0452344            |
| <b>cost</b>         | 1.2576431            | 1.2711335            | 0.7836643            |
| <b>data</b>         | 0.58200854           | 0.9005785            | 0.8108658            |
| <b>decision</b>     | 0.58954525           | 1.2577693            | 1.1038465            |
| <b>degree</b>       | 0.95230186           | 0.8389481            | 0.7942543            |
| <b>design</b>       | 0.5490281            | 0.8148851            | 1.1180898            |
| <b>developed</b>    | 0.37438333           | 0.91824883           | 0.8058555            |
| <b>development</b>  | 0.38515016           | 0.5351098            | 0.7025778            |

|                       |             |            |            |
|-----------------------|-------------|------------|------------|
| <b>different</b>      | 0.3225091   | 0.5198112  | 0.71749526 |
| <b>distributed</b>    | 0.31038618  | 0.32626423 | 0.60364556 |
| <b>distribution</b>   | 1.7732377   | 1.5719303  | 0.82585615 |
| <b>dynamic</b>        | 0.55088043  | 0.9107053  | 0.9269776  |
| <b>dynamics</b>       | 0.14972813  | 0.7974305  | 0.69932073 |
| <b>effect</b>         | 0.6954923   | 1.2859349  | 0.7723395  |
| <b>effort</b>         | 0.4611836   | 0.8033428  | 0.98084193 |
| <b>engineering</b>    | 0.4324362   | 0.4155957  | 0.6639561  |
| <b>environment</b>    | 0.28969377  | 0.39282212 | 0.59849167 |
| <b>event</b>          | 0.6714238   | 0.7981628  | 0.9913244  |
| <b>execution</b>      | 0.55361485  | 0.36503226 | 0.96964324 |
| <b>form</b>           | 1.3474895   | 0.91477215 | 1.1845177  |
| <b>function</b>       | 2.4742365   | 1.4386451  | 0.93166345 |
| <b>future</b>         | 0.8530041   | 0.5760234  | 0.73054516 |
| <b>group</b>          | 2.4999826   | 0.60174435 | 0.71535414 |
| <b>HLA</b>            | 0           | 0          | 0          |
| <b>implementation</b> | 0.1572205   | 0.55245143 | 0.7653083  |
| <b>information</b>    | 0.669428    | 0.6579801  | 0.7807353  |
| <b>input</b>          | 1.7184485   | 1.3855355  | 1.479353   |
| <b>interface</b>      | 0.097976215 | 0.3295625  | 0.8840155  |
| <b>knowledge</b>      | 0.1655913   | 0.3381781  | 1.0151023  |
| <b>large</b>          | 1.1197902   | 1.1873094  | 0.96126264 |
| <b>level</b>          | 0.71986896  | 0.60535556 | 0.8418291  |
| <b>M&amp;s</b>        | 0           | 0          | 0          |
| <b>management</b>     | 0.657868    | 0.583121   | 0.8068512  |
| <b>method</b>         | 1.2285634   | 0.8741862  | 0.86993647 |
| <b>model</b>          | 0.40954033  | 0.9985194  | 1.1325938  |
| <b>modeling</b>       | 0.13387924  | 0.55297804 | 0.8432729  |
| <b>network</b>        | 0.67015696  | 0.77902704 | 0.8536465  |
| <b>object</b>         | 0.032112394 | 0.15527359 | 0.42950034 |
| <b>operations</b>     | 0.98653483  | 0.9257138  | 0.72218996 |
| <b>order</b>          | 0.6830005   | 0.72857606 | 0.79247135 |
| <b>output</b>         | 2.1106544   | 1.331176   | 1.4189588  |
| <b>parameters</b>     | 0.40879977  | 1.2676511  | 0.9942678  |
| <b>particular</b>     | 1.1458409   | 0.95864964 | 0.826595   |
| <b>performance</b>    | 0.18150532  | 0.612914   | 0.6836704  |
| <b>policy</b>         | 0.47558373  | 0.83318764 | 1.1232523  |
| <b>population</b>     | 0.6997844   | 1.3579983  | 0.60425687 |

|                     |             |            |            |
|---------------------|-------------|------------|------------|
| <b>power</b>        | 0.964939    | 0.77086896 | 0.6107291  |
| <b>problem</b>      | 1.5776448   | 1.1452373  | 1.1710384  |
| <b>process</b>      | 0.5991664   | 0.49732226 | 0.7964327  |
| <b>product</b>      | 0.38106057  | 0.3547764  | 0.70208967 |
| <b>production</b>   | 0.921808    | 0.655914   | 1.2814586  |
| <b>program</b>      | 2.8298419   | 2.568767   | 1.625937   |
| <b>project</b>      | 0.5563588   | 0.48978657 | 0.74467844 |
| <b>quality</b>      | 0.3121284   | 0.8020114  | 0.58534    |
| <b>rate</b>         | 1.2879666   | 1.4477943  | 0.90819645 |
| <b>requirements</b> | 0.31013116  | 0.4470805  | 0.61725837 |
| <b>research</b>     | 0.30081272  | 0.35069573 | 0.6368116  |
| <b>resources</b>    | 0.118520565 | 0.57806784 | 0.7397609  |
| <b>result</b>       | 0.82663727  | 1.0084997  | 0.9011403  |
| <b>service</b>      | 0.29551506  | 0.74551773 | 0.62868595 |
| <b>simulated</b>    | 1.245175    | 1.5270184  | 1.0031171  |
| <b>simulation</b>   | 0.45829222  | 0.6840259  | 0.9465116  |
| <b>size</b>         | 0.8103115   | 1.2739421  | 1.0293707  |
| <b>social</b>       | 2.0577173   | 0.6903133  | 0.43917742 |
| <b>software</b>     | 0.13339524  | 0.5404812  | 0.8814547  |
| <b>source</b>       | 1.0031917   | 1.0453411  | 0.68754774 |
| <b>standard</b>     | 0.73121756  | 0.64783984 | 0.56550837 |
| <b>structure</b>    | 0.8854967   | 0.9874521  | 1.1662599  |
| <b>study</b>        | 0.6871502   | 0.7736655  | 0.89474344 |
| <b>system</b>       | 0.61482483  | 0.9471913  | 1.1931263  |
| <b>techniques</b>   | 0.80884904  | 1.2003195  | 1.2140265  |
| <b>technology</b>   | 0.3963689   | 0.21211042 | 0.47907653 |
| <b>test</b>         | 0.4162015   | 0.77681607 | 0.8348369  |
| <b>time</b>         | 1.2406639   | 1.2126411  | 1.1007806  |
| <b>tool</b>         | 0.32009587  | 0.40593556 | 0.7110761  |
| <b>total</b>        | 1.8383026   | 1.8288242  | 0.8336835  |
| <b>training</b>     | 0.258729    | 0.14339948 | 0.1498042  |
| <b>type</b>         | 1.0798132   | 1.097989   | 1.1210757  |
| <b>unit</b>         | 0.92572796  | 0.9833273  | 0.876637   |
| <b>user</b>         | 0.7674001   | 0.8395991  | 0.9476073  |
| <b>V&amp;v</b>      | 0           | 0          | 0          |
| <b>validation</b>   | 0.059732933 | 0.5588187  | 0.9296985  |
| <b>value</b>        | 1.6251948   | 1.1685401  | 1.0213066  |
| <b>verification</b> | 0.99332595  | 0.8121091  | 1.1387695  |

|             |            |          |           |
|-------------|------------|----------|-----------|
| <b>work</b> | 0.93607825 | 0.407846 | 0.5864682 |
|-------------|------------|----------|-----------|

| <b>FOLDER1_1990s</b> | <b>FOLDER1_2000s</b> | <b>FOLDER1_2010s</b> |
|----------------------|----------------------|----------------------|
| 0.94045585           | 1.1000152            | 0.9871828            |
| 0.45894092           | 1.0492007            | 1.5925264            |
| 1.0098096            | 0.8779787            | 1.3039843            |
| 1.0111884            | 0.98389876           | 1.0310938            |
| 0.9806923            | 1.088337             | 0.9982841            |
| 0.8670603            | 0.988478             | 1.2194313            |
| 0.8630763            | 1.2493474            | 0.9701438            |
| 1.0551256            | 0.97591424           | 1.0344204            |
| 0.74530095           | 0.8686853            | 1.3874782            |
| 0.8839037            | 0.9949605            | 1.1095154            |
| 1.0669132            | 1.2197835            | 0.785949             |
| 0.89380115           | 0.9080289            | 1.2896514            |
| 0.6784467            | 1.03026              | 1.2691401            |
| 1.0953               | 0.905023             | 1.1185794            |
| 0.8150459            | 0.98143077           | 1.2273523            |
| 0.92138404           | 1.1786519            | 0.9013856            |
| 1.1730734            | 0.877048             | 0.6605052            |
| 1.0014               | 0.9523686            | 1.033019             |
| 0.985976             | 0.9494695            | 1.1052883            |
| 1.0404075            | 1.0173944            | 1.0047361            |
| 0.9447016            | 0.9307512            | 1.102689             |
| 1.0557141            | 1.030871             | 0.9768023            |
| 1.0864369            | 0.9348337            | 1.0374249            |
| 1.017802             | 1.0586525            | 0.9613793            |
| 1.1301532            | 1.1100639            | 0.8649587            |

|            |            |            |
|------------|------------|------------|
| 0.8090023  | 0.97805667 | 1.273605   |
| 1.1171193  | 1.1933895  | 0.7898216  |
| 0.99512863 | 0.8820921  | 1.1562746  |
| 0.88506097 | 0.9555894  | 1.1738431  |
| 0.62340015 | 1.0064161  | 1.3379036  |
| 0.8393309  | 0.98029596 | 1.167444   |
| 1.0811841  | 1.1756556  | 0.71420705 |
| 0.78640527 | 1.0867281  | 1.1449323  |
| 0.946959   | 1.1222631  | 1.0045263  |
| 1.2312117  | 0.9327593  | 0.9719764  |
| 1.2218293  | 0.9950114  | 0.9283373  |
| 1.1026697  | 0.9456748  | 0.9734335  |
| 1.0645183  | 0.8556462  | 1.1252956  |
| 0.9527973  | 1.0260268  | 1.0899374  |
| 0.9002981  | 1.0109848  | 1.1193731  |
| 1.3725234  | 1.5266478  | 0.28939345 |
| 1.0266596  | 1.0494578  | 1.012615   |
| 0.94405746 | 1.1286653  | 0.92778116 |
| 1.0800012  | 0.84855765 | 1.0223981  |
| 1.3288057  | 1.087469   | 0.7494198  |
| 0.9147225  | 1.073848   | 1.01287    |
| 1.0784533  | 0.9456298  | 1.0200422  |
| 0.87514234 | 1.0343449  | 1.1042087  |
| 0.6080299  | 1.2621912  | 1.1900214  |
| 0.9667842  | 1.0054498  | 1.0973859  |
| 0.8391702  | 0.9220889  | 1.2579556  |
| 0.93213934 | 0.9401688  | 1.1154412  |
| 0.8488856  | 1.0055073  | 1.1789984  |
| 0.8522599  | 1.0027032  | 1.1503237  |
| 1.8100903  | 1.0272925  | 0.6369378  |
| 1.0973185  | 1.0429609  | 0.93928367 |
| 0.8981536  | 0.9641785  | 1.1949766  |
| 1.1549282  | 0.8737275  | 0.94623667 |
| 0.870222   | 0.89993596 | 1.224526   |
| 1.1117969  | 1.0320567  | 0.9173668  |
| 1.0153793  | 1.05437    | 1.0252923  |
| 0.50387615 | 0.9145683  | 1.4517504  |
| 0.47065613 | 0.821074   | 1.6800973  |

|            |            |            |
|------------|------------|------------|
| 0.6218684  | 0.9751665  | 1.3930229  |
| 1.0975068  | 0.96453375 | 0.9283494  |
| 0.9787548  | 1.0748018  | 0.9964413  |
| 0.8195638  | 1.1387558  | 1.04289    |
| 0.973003   | 0.93207955 | 1.0872486  |
| 1.2872367  | 0.9813389  | 0.53616995 |
| 0.9652288  | 0.9999617  | 1.1299316  |
| 0.7825018  | 1.10987    | 1.1001263  |
| 0.61541957 | 0.98204935 | 1.2590147  |
| 1.075384   | 1.1729269  | 0.8348767  |
| 0.77799547 | 1.0289589  | 1.2504767  |
| 0.8819392  | 0.9693823  | 1.2320926  |
| 0.9105714  | 0.97687835 | 1.1178607  |
| 0.8813439  | 1.0796088  | 1.075347   |
| 1.081779   | 0.91874206 | 1.0181191  |
| 1.1212212  | 1.0011638  | 0.96582407 |
| 1.0505191  | 0.9004831  | 1.0890762  |
| 0.34091207 | 0.90398556 | 1.710595   |
| 1.1721355  | 1.1044121  | 0.8100879  |
| 0.8496635  | 1.0362241  | 1.1105546  |
| 0.94734484 | 1.131952   | 0.96799785 |
| 0.8758298  | 0.9634019  | 1.1031351  |
| 0.79701686 | 0.922314   | 1.2979592  |
| 1.0285478  | 0.9631804  | 1.0046129  |
| 1.0488703  | 0.9487836  | 0.98345935 |
| 1.0687053  | 1.2066334  | 0.83763254 |
| 1.1818978  | 1.0541029  | 0.86429054 |
| 1.0155276  | 0.9382583  | 1.0376222  |
| 1.101221   | 1.09289    | 0.9198115  |
| 0.7293267  | 0.8510217  | 1.3541669  |
| 1.098275   | 1.1968174  | 0.9136153  |
| 1.0383606  | 0.9881595  | 0.95595396 |
| 1.1148587  | 0.8998446  | 1.1034709  |
| 1.0428853  | 1.002201   | 0.9974172  |
| 1.0364705  | 1.3022768  | 0.8467007  |
| 1.0092229  | 0.98165184 | 1.0902508  |
| 0.87174064 | 0.8981084  | 1.207178   |
| 1.1820645  | 1.0737939  | 0.75455475 |

|           |          |           |
|-----------|----------|-----------|
| 0.8285142 | 1.011163 | 1.2387869 |
|-----------|----------|-----------|
