# Supplementary material for: A content analysis-based approach to explore simulation verification and identify its current challenges
Source: PubMed Central journal article supplement (PMC7219780; doi:10.1371/journal.pone.0232929), 2020-05-13
Supplement: pone.0232929.s003.pdf [file pone.0232929.s003.pdf]

**S3 Supplemental.** Lists of concepts that are prominent alongside verification when we apply content analysis to each decade's publications independently.

Concept prominences and frequencies pertaining to "Verification" in each decade. Content analysis was conducted on each decade using only that decade's publications from the Verification Corpus. Therefore, a total of six content analyses were conducted.

**Concepts per decade.**

| <b>Decade</b> | <b>Number of prominent concepts identified with respect to verification each decade</b> | <b>Number of prominent concepts identified with respect to verification each decade with prominence greater than 0</b> |
|---------------|-----------------------------------------------------------------------------------------|------------------------------------------------------------------------------------------------------------------------|
| 1960s         | 54                                                                                      | 46                                                                                                                     |
| 1970s         | 84                                                                                      | 81                                                                                                                     |
| 1980s         | 69                                                                                      | 69                                                                                                                     |
| 1990s         | 77                                                                                      | 77                                                                                                                     |
| 2000s         | 95                                                                                      | 95                                                                                                                     |
| 2010s         | 89                                                                                      | 89                                                                                                                     |

**Notes**  
 \* Values of 0 may appear as these concepts have non-0 values with respect to other concepts within their decade.

**1960s.**

| <b>Concept</b> | <b>Prominence with respect to verification</b> | <b>Frequency with respect to verification</b> |
|----------------|------------------------------------------------|-----------------------------------------------|
| verification   | 66.826                                         | 46                                            |
| solution       | 8.449                                          | 11                                            |
| results        | 6.331                                          | 9                                             |
| analog         | 6.075                                          | 15                                            |
| method         | 5.503                                          | 7                                             |
| described      | 5.043                                          | 4                                             |
| case           | 4.950                                          | 4                                             |
| given          | 4.455                                          | 5                                             |
| logic          | 3.819                                          | 4                                             |
| work           | 3.819                                          | 4                                             |
| order          | 3.457                                          | 3                                             |
| example        | 3.398                                          | 3                                             |
| problem        | 2.688                                          | 7                                             |

|              |       |   |
|--------------|-------|---|
| particular   | 2.673 | 2 |
| design       | 2.673 | 2 |
| available    | 2.638 | 3 |
| rate         | 2.522 | 2 |
| data         | 2.404 | 5 |
| machine      | 2.228 | 2 |
| output       | 2.056 | 4 |
| model        | 2.016 | 7 |
| computer     | 1.985 | 9 |
| simulation   | 1.946 | 6 |
| value        | 1.787 | 5 |
| used         | 1.694 | 9 |
| information  | 1.630 | 2 |
| dquo         | 1.604 | 3 |
| activity     | 1.530 | 3 |
| digital      | 1.412 | 3 |
| input        | 1.392 | 2 |
| social       | 1.337 | 1 |
| possible     | 1.285 | 1 |
| system       | 1.280 | 5 |
| Fortran      | 1.261 | 1 |
| individual   | 1.193 | 1 |
| level        | 1.133 | 1 |
| distribution | 1.114 | 1 |
| facility     | 1.096 | 1 |
| function     | 1.072 | 3 |
| bone         | 1.028 | 1 |
| error        | 0.997 | 1 |
| required     | 0.941 | 1 |
| time         | 0.857 | 4 |
| response     | 0.857 | 1 |
| process      | 0.548 | 1 |
| program      | 0.499 | 1 |
| control      | 0     | 0 |
| group        | 0     | 0 |
| operation    | 0     | 0 |
| behavior     | 0     | 0 |
| equipment    | 0     | 0 |
| during       | 0     | 0 |
| total        | 0     | 0 |
| event        | 0     | 0 |
|              |       |   |
|              |       |   |
|              |       |   |

| <b>1970s.</b>  |                                                |                                               |
|----------------|------------------------------------------------|-----------------------------------------------|
| <b>Concept</b> | <b>Prominence with respect to verification</b> | <b>Frequency with respect to verification</b> |
| verification   | 95.569                                         | 153                                           |
| design         | 6.072                                          | 23                                            |
| results        | 5.188                                          | 31                                            |
| program        | 4.559                                          | 28                                            |
| test           | 4.518                                          | 13                                            |
| process        | 4.497                                          | 20                                            |
| software       | 4.364                                          | 10                                            |
| provide        | 4.247                                          | 10                                            |
| development    | 3.995                                          | 13                                            |
| techniques     | 3.869                                          | 10                                            |
| real           | 3.240                                          | 8                                             |
| simulation     | 3.025                                          | 51                                            |
| described      | 2.911                                          | 6                                             |
| complex        | 2.626                                          | 5                                             |
| computer       | 2.564                                          | 15                                            |
| performance    | 2.553                                          | 7                                             |
| model          | 2.526                                          | 75                                            |
| approach       | 2.515                                          | 6                                             |
| used           | 2.463                                          | 44                                            |
| analysis       | 2.440                                          | 12                                            |
| changes        | 2.320                                          | 10                                            |
| research       | 2.294                                          | 3                                             |
| study          | 2.285                                          | 6                                             |
| parameters     | 2.230                                          | 7                                             |
| include        | 2.223                                          | 4                                             |
| system         | 2.038                                          | 41                                            |
| required       | 2.033                                          | 8                                             |
| conditions     | 2.016                                          | 5                                             |
| work           | 1.977                                          | 3                                             |
| form           | 1.850                                          | 3                                             |
| output         | 1.833                                          | 7                                             |
| effects        | 1.826                                          | 3                                             |
| random         | 1.812                                          | 4                                             |
| user           | 1.798                                          | 7                                             |
| operation      | 1.707                                          | 4                                             |
| problem        | 1.688                                          | 10                                            |
| behavior       | 1.677                                          | 3                                             |
| large          | 1.641                                          | 4                                             |
| dynamic        | 1.629                                          | 3                                             |
| flow           | 1.580                                          | 4                                             |

|              |       |    |
|--------------|-------|----|
| operations   | 1.525 | 3  |
| data         | 1.485 | 16 |
| specific     | 1.470 | 3  |
| modeling     | 1.457 | 5  |
| response     | 1.419 | 3  |
| available    | 1.377 | 5  |
| necessary    | 1.359 | 3  |
| area         | 1.309 | 5  |
| air          | 1.309 | 3  |
| information  | 1.298 | 5  |
| values       | 1.285 | 8  |
| structure    | 1.161 | 3  |
| simulated    | 1.151 | 3  |
| time         | 1.124 | 16 |
| times        | 1.107 | 3  |
| input        | 1.083 | 4  |
| line         | 1.068 | 2  |
| several      | 1.039 | 2  |
| important    | 0.985 | 2  |
| effect       | 0.923 | 2  |
| function     | 0.913 | 3  |
| variables    | 0.890 | 3  |
| control      | 0.817 | 4  |
| period       | 0.810 | 2  |
| cost         | 0.738 | 2  |
| distribution | 0.738 | 2  |
| level        | 0.700 | 2  |
| rate         | 0.693 | 2  |
| order        | 0.678 | 2  |
| decision     | 0.661 | 2  |
| points       | 0.637 | 1  |
| aircraft     | 0.534 | 1  |
| event        | 0.522 | 1  |
| size         | 0.519 | 1  |
| particular   | 0.483 | 1  |
| network      | 0.449 | 1  |
| method       | 0.440 | 1  |
| type         | 0.398 | 1  |
| possible     | 0.366 | 1  |
| total        | 0.355 | 1  |
| developed    | 0.302 | 1  |
| general      | 0     | 0  |
| service      | 0     | 0  |
| basic        | 0     | 0  |

| <b>1980s.</b>  |                                                |                                               |
|----------------|------------------------------------------------|-----------------------------------------------|
| <b>Concept</b> | <b>Prominence with respect to verification</b> | <b>Frequency with respect to verification</b> |
| verification   | 43.482                                         | 888                                           |
| validation     | 10.795                                         | 251                                           |
| programming    | 2.980                                          | 44                                            |
| development    | 2.912                                          | 88                                            |
| computer       | 2.834                                          | 82                                            |
| application    | 2.700                                          | 48                                            |
| model          | 2.634                                          | 573                                           |
| process        | 2.623                                          | 137                                           |
| design         | 2.551                                          | 90                                            |
| analysis       | 2.549                                          | 101                                           |
| program        | 2.424                                          | 65                                            |
| tools          | 2.332                                          | 37                                            |
| study          | 2.183                                          | 49                                            |
| knowledge      | 2.149                                          | 39                                            |
| developed      | 2.062                                          | 46                                            |
| software       | 2.049                                          | 54                                            |
| method         | 1.920                                          | 51                                            |
| results        | 1.824                                          | 64                                            |
| complex        | 1.764                                          | 28                                            |
| based          | 1.738                                          | 41                                            |
| problem        | 1.729                                          | 81                                            |
| decision       | 1.725                                          | 38                                            |
| possible       | 1.699                                          | 41                                            |
| output         | 1.687                                          | 49                                            |
| simulation     | 1.537                                          | 229                                           |
| work           | 1.495                                          | 26                                            |
| general        | 1.452                                          | 32                                            |
| base           | 1.424                                          | 30                                            |
| used           | 1.401                                          | 173                                           |
| behavior       | 1.367                                          | 36                                            |
| user           | 1.364                                          | 45                                            |
| data           | 1.347                                          | 87                                            |
| support        | 1.344                                          | 25                                            |
| structure      | 1.343                                          | 31                                            |
| information    | 1.335                                          | 43                                            |
| input          | 1.277                                          | 35                                            |
| language       | 1.248                                          | 39                                            |
| area           | 1.185                                          | 16                                            |
| different      | 1.178                                          | 36                                            |
| system         | 1.165                                          | 181                                           |



| <b>1990s.</b>  |                                                |                                               |
|----------------|------------------------------------------------|-----------------------------------------------|
| <b>Concept</b> | <b>Prominence with respect to verification</b> | <b>Frequency with respect to verification</b> |
| verification   | 22.997                                         | 5015                                          |
| validation     | 20.908                                         | 3302                                          |
| M&s            | 2.933                                          | 156                                           |
| test           | 2.858                                          | 694                                           |
| model          | 2.535                                          | 2559                                          |
| development    | 2.153                                          | 533                                           |
| implementation | 2.112                                          | 207                                           |
| results        | 2.068                                          | 417                                           |
| requirements   | 2.049                                          | 312                                           |
| behavior       | 2.018                                          | 252                                           |
| process        | 1.983                                          | 778                                           |
| application    | 1.904                                          | 223                                           |
| problem        | 1.859                                          | 315                                           |
| design         | 1.778                                          | 338                                           |
| analysis       | 1.683                                          | 366                                           |
| approach       | 1.675                                          | 265                                           |
| structure      | 1.608                                          | 174                                           |
| support        | 1.581                                          | 294                                           |
| program        | 1.566                                          | 185                                           |
| software       | 1.563                                          | 294                                           |
| output         | 1.553                                          | 198                                           |
| research       | 1.550                                          | 188                                           |
| data           | 1.539                                          | 743                                           |
| include        | 1.530                                          | 209                                           |
| computer       | 1.509                                          | 162                                           |
| simulation     | 1.454                                          | 1577                                          |
| distributed    | 1.418                                          | 154                                           |
| developed      | 1.414                                          | 209                                           |
| used           | 1.401                                          | 1134                                          |
| tools          | 1.252                                          | 264                                           |
| system         | 1.248                                          | 966                                           |
| modeling       | 1.241                                          | 228                                           |
| current        | 1.231                                          | 136                                           |
| described      | 1.219                                          | 121                                           |
| resources      | 1.200                                          | 101                                           |
| including      | 1.198                                          | 90                                            |
| project        | 1.180                                          | 135                                           |
| level          | 1.174                                          | 195                                           |
| conditions     | 1.137                                          | 86                                            |
| provide        | 1.130                                          | 394                                           |





| <b>2000s.</b>  |                                                |                                               |
|----------------|------------------------------------------------|-----------------------------------------------|
| <b>Concept</b> | <b>Prominence with respect to verification</b> | <b>Frequency with respect to verification</b> |
| verification   | 26.359                                         | 9697                                          |
| validation     | 25.043                                         | 6811                                          |
| effort         | 2.577                                          | 348                                           |
| model          | 2.253                                          | 4404                                          |
| development    | 2.243                                          | 1030                                          |
| test           | 2.237                                          | 584                                           |
| M&s            | 2.229                                          | 446                                           |
| results        | 2.221                                          | 891                                           |
| requirements   | 2.199                                          | 653                                           |
| process        | 2.186                                          | 1837                                          |
| activities     | 2.122                                          | 362                                           |
| team           | 2.015                                          | 263                                           |
| program        | 1.960                                          | 336                                           |
| design         | 1.872                                          | 567                                           |
| knowledge      | 1.795                                          | 310                                           |
| analysis       | 1.791                                          | 727                                           |
| simulation     | 1.761                                          | 3239                                          |
| output         | 1.741                                          | 308                                           |
| implementation | 1.737                                          | 303                                           |
| behavior       | 1.727                                          | 431                                           |
| modeling       | 1.679                                          | 729                                           |
| developed      | 1.633                                          | 436                                           |
| software       | 1.616                                          | 494                                           |
| application    | 1.600                                          | 567                                           |
| data           | 1.545                                          | 1298                                          |
| study          | 1.498                                          | 333                                           |
| support        | 1.461                                          | 461                                           |
| tools          | 1.456                                          | 552                                           |
| used           | 1.452                                          | 2387                                          |
| approach       | 1.426                                          | 447                                           |
| project        | 1.415                                          | 291                                           |
| quality        | 1.404                                          | 186                                           |
| include        | 1.387                                          | 295                                           |
| problem        | 1.353                                          | 360                                           |
| degree         | 1.325                                          | 132                                           |
| research       | 1.323                                          | 347                                           |
| areas          | 1.303                                          | 148                                           |
| described      | 1.303                                          | 216                                           |
| user           | 1.295                                          | 269                                           |
| engineering    | 1.273                                          | 170                                           |

|              |       |      |
|--------------|-------|------|
| available    | 1.261 | 297  |
| system       | 1.244 | 1780 |
| experience   | 1.232 | 130  |
| dynamics     | 1.200 | 186  |
| provide      | 1.161 | 526  |
| level        | 1.154 | 404  |
| complex      | 1.141 | 205  |
| work         | 1.131 | 306  |
| structure    | 1.107 | 211  |
| agents       | 1.104 | 231  |
| current      | 1.078 | 227  |
| training     | 1.075 | 206  |
| form         | 1.050 | 142  |
| input        | 1.043 | 168  |
| components   | 1.020 | 343  |
| architecture | 1.018 | 156  |
| method       | 1.009 | 162  |
| performance  | 0.983 | 336  |
| type         | 0.982 | 170  |
| product      | 0.958 | 345  |
| cost         | 0.953 | 154  |
| information  | 0.947 | 408  |
| scenario     | 0.939 | 154  |
| execution    | 0.925 | 163  |
| case         | 0.909 | 257  |
| distributed  | 0.881 | 183  |
| standard     | 0.875 | 146  |
| operations   | 0.869 | 147  |
| order        | 0.858 | 242  |
| environment  | 0.853 | 253  |
| management   | 0.848 | 179  |
| area         | 0.834 | 115  |
| HLA          | 0.799 | 163  |
| capabilities | 0.791 | 138  |
| variables    | 0.767 | 111  |
| group        | 0.711 | 77   |
| control      | 0.707 | 171  |
| technology   | 0.703 | 87   |
| value        | 0.688 | 215  |
| increase     | 0.687 | 85   |
| time         | 0.669 | 585  |
| service      | 0.647 | 159  |
| entity       | 0.620 | 86   |
| resources    | 0.607 | 96   |



| <b>2010s.</b>  |                                                |                                               |
|----------------|------------------------------------------------|-----------------------------------------------|
| <b>Concept</b> | <b>Prominence with respect to verification</b> | <b>Frequency with respect to verification</b> |
| verification   | 58.124                                         | 2991                                          |
| validation     | 17.138                                         | 1548                                          |
| M&s            | 4.163                                          | 255                                           |
| training       | 4.026                                          | 199                                           |
| requirements   | 3.831                                          | 269                                           |
| program        | 3.280                                          | 110                                           |
| development    | 3.116                                          | 361                                           |
| test           | 3.010                                          | 202                                           |
| tool           | 2.486                                          | 139                                           |
| engineering    | 2.384                                          | 109                                           |
| support        | 2.381                                          | 196                                           |
| process        | 2.195                                          | 520                                           |
| software       | 2.169                                          | 162                                           |
| code           | 2.123                                          | 90                                            |
| provide        | 2.079                                          | 272                                           |
| analysis       | 1.957                                          | 261                                           |
| include        | 1.922                                          | 207                                           |
| developed      | 1.921                                          | 155                                           |
| results        | 1.911                                          | 278                                           |
| application    | 1.880                                          | 125                                           |
| model          | 1.879                                          | 1385                                          |
| design         | 1.860                                          | 201                                           |
| standard       | 1.845                                          | 148                                           |
| modeling       | 1.804                                          | 258                                           |
| behavior       | 1.704                                          | 150                                           |
| simulation     | 1.691                                          | 864                                           |
| project        | 1.672                                          | 123                                           |
| data           | 1.662                                          | 437                                           |
| method         | 1.642                                          | 195                                           |
| decision       | 1.603                                          | 127                                           |
| environment    | 1.583                                          | 129                                           |
| components     | 1.425                                          | 85                                            |
| used           | 1.411                                          | 702                                           |
| approach       | 1.393                                          | 170                                           |
| information    | 1.359                                          | 162                                           |
| system         | 1.353                                          | 601                                           |
| structure      | 1.342                                          | 91                                            |
| distributed    | 1.306                                          | 60                                            |
| framework      | 1.300                                          | 80                                            |
| based          | 1.275                                          | 186                                           |

|             |       |     |
|-------------|-------|-----|
| complex     | 1.233 | 90  |
| output      | 1.232 | 80  |
| scenario    | 1.220 | 75  |
| social      | 1.211 | 59  |
| management  | 1.190 | 83  |
| performance | 1.190 | 122 |
| study       | 1.164 | 112 |
| level       | 1.159 | 134 |
| problem     | 1.050 | 93  |
| group       | 1.043 | 44  |
| operations  | 1.042 | 51  |
| elements    | 1.016 | 52  |
| order       | 0.989 | 108 |
| input       | 0.951 | 61  |
| degree      | 0.946 | 29  |
| research    | 0.945 | 94  |
| dynamics    | 0.891 | 54  |
| control     | 0.880 | 73  |
| event       | 0.861 | 89  |
| parameters  | 0.856 | 62  |
| cost        | 0.852 | 48  |
| individual  | 0.817 | 46  |
| case        | 0.802 | 84  |
| service     | 0.782 | 62  |
| different   | 0.780 | 122 |
| area        | 0.777 | 39  |
| effect      | 0.773 | 37  |
| agents      | 0.743 | 77  |
| market      | 0.719 | 27  |
| energy      | 0.703 | 33  |
| type        | 0.657 | 36  |
| time        | 0.649 | 174 |
| change      | 0.643 | 42  |
| resources   | 0.638 | 59  |
| variables   | 0.635 | 39  |
| value       | 0.624 | 84  |
| policy      | 0.608 | 39  |
| function    | 0.568 | 34  |
| network     | 0.526 | 39  |
| production  | 0.454 | 27  |
| supply      | 0.451 | 21  |
| algorithm   | 0.447 | 19  |
| population  | 0.437 | 19  |
| patients    | 0.400 | 20  |

|              |       |    |
|--------------|-------|----|
| rate         | 0.344 | 17 |
| water        | 0.344 | 8  |
| distribution | 0.341 | 19 |
| power        | 0.289 | 13 |
| demand       | 0.238 | 12 |
