# Supplementary material for: A content analysis-based approach to explore simulation verification and identify its current challenges
Source: PubMed Central journal article supplement (PMC7219780; doi:10.1371/journal.pone.0232929), 2020-05-13
Supplement: pone.0232929.s004.pdf [file pone.0232929.s004.pdf]

|                                                                                                                                                                                                                                                                                      |                                |  |  |  |  |
|--------------------------------------------------------------------------------------------------------------------------------------------------------------------------------------------------------------------------------------------------------------------------------------|--------------------------------|--|--|--|--|
|                                                                                                                                                                                                                                                                                      |                                |  |  |  |  |
| <p><b>S4 Supplemental.</b> List of thesaurus terms containing "verification" obtained from conducting separate content analyses on each individual decade within the Verification Corpus.</p>                                                                                        |                                |  |  |  |  |
|                                                                                                                                                                                                                                                                                      |                                |  |  |  |  |
| <p>The complete list of unfiltered thesaurus results for terms associated with <i>Verification</i> each decade. Content analysis was conducted on each decade using only that decade's publications from the Verification Corpus (resulting in a total of six content analyses).</p> |                                |  |  |  |  |
|                                                                                                                                                                                                                                                                                      |                                |  |  |  |  |
| <p><b>Number of related terms per decade.</b></p>                                                                                                                                                                                                                                    |                                |  |  |  |  |
| <b>Decade</b>                                                                                                                                                                                                                                                                        | <b>Number of Related Terms</b> |  |  |  |  |
| 1960s                                                                                                                                                                                                                                                                                | 58                             |  |  |  |  |
| 1970s                                                                                                                                                                                                                                                                                | 139                            |  |  |  |  |
| 1980s                                                                                                                                                                                                                                                                                | 148                            |  |  |  |  |
| 1990s                                                                                                                                                                                                                                                                                | 198                            |  |  |  |  |
| 2000s                                                                                                                                                                                                                                                                                | 223                            |  |  |  |  |
| 2010s                                                                                                                                                                                                                                                                                | 191                            |  |  |  |  |
|                                                                                                                                                                                                                                                                                      |                                |  |  |  |  |
| <p><b>Score Description</b></p>                                                                                                                                                                                                                                                      |                                |  |  |  |  |
| <p>* The <i>score</i> (column 5) reflects how tightly the <i>word</i> (column 4) is connected to the concept or tag (column 2, verification).</p>                                                                                                                                    |                                |  |  |  |  |
| <p>* In other words, this is a measure of how strongly the presense of the word (column 46) predicts the appearance of the concept or tag (column 2, verification).</p>                                                                                                              |                                |  |  |  |  |
| <p>* The score value is derived from the co-occurrence information from the text along with the seeded classifier information.</p>                                                                                                                                                   |                                |  |  |  |  |
| <p>*Refer to the Leximancer Frequently Asked Questions document for more details (<a href="https://www.leximancer.com/faq/display_and_output.html">https://www.leximancer.com/faq/display_and_output.html</a>).</p>                                                                  |                                |  |  |  |  |
|                                                                                                                                                                                                                                                                                      |                                |  |  |  |  |
| <p><b>Notes</b></p>                                                                                                                                                                                                                                                                  |                                |  |  |  |  |
| <p>* <i>iterations</i> indicates the total number of times that the text corpus was reread and coded with concept definitions before reaching a stable classification.</p>                                                                                                           |                                |  |  |  |  |
| <p>* <i>value</i> indicates that these are the thesaurus terms only pertaining to "verification".</p>                                                                                                                                                                                |                                |  |  |  |  |
| <p>* <i>kind</i> column refers to the <i>value</i> column (all refer to verification), while <i>kind2</i> column refers to the <i>word</i> column.</p>                                                                                                                               |                                |  |  |  |  |
|                                                                                                                                                                                                                                                                                      |                                |  |  |  |  |
|                                                                                                                                                                                                                                                                                      |                                |  |  |  |  |
|                                                                                                                                                                                                                                                                                      |                                |  |  |  |  |

| <b>1960s.</b> |              |           |                      |           |       |
|---------------|--------------|-----------|----------------------|-----------|-------|
| iterations    | value        | kind      | word                 | score     | kind2 |
| 6             | verification | WORD,USER | verification         | 7.0707555 | WORD  |
| 6             | verification | WORD,USER | accounting           | 3.992244  | WORD  |
| 6             | verification | WORD,USER | all-digital          | 3.6686642 | WORD  |
| 6             | verification | WORD,USER | discounting          | 3.6686642 | WORD  |
| 6             | verification | WORD,USER | advocates            | 3.12821   | WORD  |
| 6             | verification | WORD,USER | alternating          | 3.12821   | WORD  |
| 6             | verification | WORD,USER | amazing              | 3.12821   | WORD  |
| 6             | verification | WORD,USER | assertion            | 3.12821   | WORD  |
| 6             | verification | WORD,USER | automatically-scaled | 3.12821   | WORD  |
| 6             | verification | WORD,USER | circled              | 3.12821   | WORD  |
| 6             | verification | WORD,USER | coding               | 3.12821   | WORD  |
| 6             | verification | WORD,USER | computer-asked       | 3.12821   | WORD  |
| 6             | verification | WORD,USER | concieved            | 3.12821   | WORD  |
| 6             | verification | WORD,USER | confronting          | 3.12821   | WORD  |
| 6             | verification | WORD,USER | consolidate          | 3.12821   | WORD  |
| 6             | verification | WORD,USER | d'etre               | 3.12821   | WORD  |
| 6             | verification | WORD,USER | declined             | 3.12821   | WORD  |
| 6             | verification | WORD,USER | deriving             | 3.12821   | WORD  |
| 6             | verification | WORD,USER | discover             | 3.12821   | WORD  |
| 6             | verification | WORD,USER | elaboration          | 3.12821   | WORD  |
| 6             | verification | WORD,USER | emas                 | 3.12821   | WORD  |
| 6             | verification | WORD,USER | enhanced             | 3.12821   | WORD  |
| 6             | verification | WORD,USER | function&dquo        | 3.12821   | WORD  |
| 6             | verification | WORD,USER | guides               | 3.12821   | WORD  |
| 6             | verification | WORD,USER | harder               | 3.12821   | WORD  |
| 6             | verification | WORD,USER | ignore               | 3.12821   | WORD  |
| 6             | verification | WORD,USER | impossibility        | 3.12821   | WORD  |
| 6             | verification | WORD,USER | in-depth             | 3.12821   | WORD  |
| 6             | verification | WORD,USER | inclusion            | 3.12821   | WORD  |
| 6             | verification | WORD,USER | influential          | 3.12821   | WORD  |
| 6             | verification | WORD,USER | investigating        | 3.12821   | WORD  |
| 6             | verification | WORD,USER | live                 | 3.12821   | WORD  |
| 6             | verification | WORD,USER | measres              | 3.12821   | WORD  |
| 6             | verification | WORD,USER | met                  | 3.12821   | WORD  |

|                   |              |             |                      |              |              |
|-------------------|--------------|-------------|----------------------|--------------|--------------|
| 6                 | verification | WORD,USER   | objection            | 3.12821      | WORD         |
| 6                 | verification | WORD,USER   | pencil               | 3.12821      | WORD         |
| 6                 | verification | WORD,USER   | ple                  | 3.12821      | WORD         |
| 6                 | verification | WORD,USER   | precautions          | 3.12821      | WORD         |
| 6                 | verification | WORD,USER   | pretend              | 3.12821      | WORD         |
| 6                 | verification | WORD,USER   | qecide               | 3.12821      | WORD         |
| 6                 | verification | WORD,USER   | quadrature           | 3.12821      | WORD         |
| 6                 | verification | WORD,USER   | raison               | 3.12821      | WORD         |
| 6                 | verification | WORD,USER   | readability          | 3.12821      | WORD         |
| 6                 | verification | WORD,USER   | referenceto-ground   | 3.12821      | WORD         |
| 6                 | verification | WORD,USER   | refinement           | 3.12821      | WORD         |
| 6                 | verification | WORD,USER   | sam                  | 3.12821      | WORD         |
| 6                 | verification | WORD,USER   | shooting             | 3.12821      | WORD         |
| 6                 | verification | WORD,USER   | spending             | 3.12821      | WORD         |
| 6                 | verification | WORD,USER   | stimuli&dquo         | 3.12821      | WORD         |
| 6                 | verification | WORD,USER   | strongly             | 3.12821      | WORD         |
| 6                 | verification | WORD,USER   | suggest              | 3.12821      | WORD         |
| 6                 | verification | WORD,USER   | tilt&dquo            | 3.12821      | WORD         |
| 6                 | verification | WORD,USER   | tution               | 3.12821      | WORD         |
| 6                 | verification | WORD,USER   | vague                | 3.12821      | WORD         |
| 6                 | verification | WORD,USER   | well-being           | 3.12821      | WORD         |
| 6                 | verification | WORD,USER   | xy                   | 3.12821      | WORD         |
| 6                 | verification | WORD,USER   | xz                   | 3.12821      | WORD         |
| 6                 | verification | WORD,USER   | emphasized           | 1.9294441    | WORD         |
|                   |              |             |                      |              |              |
|                   |              |             |                      |              |              |
| <b>1970s.</b>     |              |             |                      |              |              |
| <b>iterations</b> | <b>value</b> | <b>kind</b> | <b>word</b>          | <b>score</b> | <b>kind2</b> |
| 6                 | verification | WORD,USER   | verification         | 8.878786     | WORD         |
| 6                 | verification | WORD,USER   | assurance            | 3.9589272    | WORD         |
| 6                 | verification | WORD,USER   | mathematical-logical | 3.7669551    | WORD         |
| 6                 | verification | WORD,USER   | cussed               | 3.498189     | WORD         |
| 6                 | verification | WORD,USER   | intends              | 3.498189     | WORD         |
| 6                 | verification | WORD,USER   | verifies             | 3.498189     | WORD         |
| 6                 | verification | WORD,USER   | 1nplcations          | 3.0418134    | WORD         |
| 6                 | verification | WORD,USER   | airplanes            | 3.0418134    | WORD         |
| 6                 | verification | WORD,USER   | aleatoric            | 3.0418134    | WORD         |
| 6                 | verification | WORD,USER   | and-validation       | 3.0418134    | WORD         |

|   |              |           |                |           |      |
|---|--------------|-----------|----------------|-----------|------|
| 6 | verification | WORD,USER | aodel          | 3.0418134 | WORD |
| 6 | verification | WORD,USER | ascen          | 3.0418134 | WORD |
| 6 | verification | WORD,USER | attaches       | 3.0418134 | WORD |
| 6 | verification | WORD,USER | auth           | 3.0418134 | WORD |
| 6 | verification | WORD,USER | availale       | 3.0418134 | WORD |
| 6 | verification | WORD,USER | becaus         | 3.0418134 | WORD |
| 6 | verification | WORD,USER | betvleen       | 3.0418134 | WORD |
| 6 | verification | WORD,USER | c9st           | 3.0418134 | WORD |
| 6 | verification | WORD,USER | capobility     | 3.0418134 | WORD |
| 6 | verification | WORD,USER | chaired        | 3.0418134 | WORD |
| 6 | verification | WORD,USER | civilian       | 3.0418134 | WORD |
| 6 | verification | WORD,USER | cohtinuous-par | 3.0418134 | WORD |
| 6 | verification | WORD,USER | coincides      | 3.0418134 | WORD |
| 6 | verification | WORD,USER | compile-time   | 3.0418134 | WORD |
| 6 | verification | WORD,USER | concurrency    | 3.0418134 | WORD |
| 6 | verification | WORD,USER | conmnonly      | 3.0418134 | WORD |
| 6 | verification | WORD,USER | consulants     | 3.0418134 | WORD |
| 6 | verification | WORD,USER | conveniences   | 3.0418134 | WORD |
| 6 | verification | WORD,USER | corrert        | 3.0418134 | WORD |
| 6 | verification | WORD,USER | coulq          | 3.0418134 | WORD |
| 6 | verification | WORD,USER | developn       | 3.0418134 | WORD |
| 6 | verification | WORD,USER | dew            | 3.0418134 | WORD |
| 6 | verification | WORD,USER | dfgital        | 3.0418134 | WORD |
| 6 | verification | WORD,USER | differentiates | 3.0418134 | WORD |
| 6 | verification | WORD,USER | digitals       | 3.0418134 | WORD |
| 6 | verification | WORD,USER | dratnatically  | 3.0418134 | WORD |
| 6 | verification | WORD,USER | eaker          | 3.0418134 | WORD |
| 6 | verification | WORD,USER | easurement     | 3.0418134 | WORD |
| 6 | verification | WORD,USER | echniques      | 3.0418134 | WORD |
| 6 | verification | WORD,USER | elers          | 3.0418134 | WORD |
| 6 | verification | WORD,USER | equated        | 3.0418134 | WORD |
| 6 | verification | WORD,USER | eri            | 3.0418134 | WORD |
| 6 | verification | WORD,USER | erlooked       | 3.0418134 | WORD |
| 6 | verification | WORD,USER | ewpoint        | 3.0418134 | WORD |
| 6 | verification | WORD,USER | exercis        | 3.0418134 | WORD |
| 6 | verification | WORD,USER | extensible     | 3.0418134 | WORD |
| 6 | verification | WORD,USER | fault-free     | 3.0418134 | WORD |
| 6 | verification | WORD,USER | foundation     | 3.0418134 | WORD |

|   |              |           |                   |           |      |
|---|--------------|-----------|-------------------|-----------|------|
| 6 | verification | WORD,USER | genrated          | 3.0418134 | WORD |
| 6 | verification | WORD,USER | gratifying        | 3.0418134 | WORD |
| 6 | verification | WORD,USER | hiietqrical       | 3.0418134 | WORD |
| 6 | verification | WORD,USER | hove              | 3.0418134 | WORD |
| 6 | verification | WORD,USER | hurdles           | 3.0418134 | WORD |
| 6 | verification | WORD,USER | i'ois             | 3.0418134 | WORD |
| 6 | verification | WORD,USER | i'ssile           | 3.0418134 | WORD |
| 6 | verification | WORD,USER | iation            | 3.0418134 | WORD |
| 6 | verification | WORD,USER | idatlon           | 3.0418134 | WORD |
| 6 | verification | WORD,USER | iing              | 3.0418134 | WORD |
| 6 | verification | WORD,USER | ilgorithms        | 3.0418134 | WORD |
| 6 | verification | WORD,USER | implmentat        | 3.0418134 | WORD |
| 6 | verification | WORD,USER | imulator          | 3.0418134 | WORD |
| 6 | verification | WORD,USER | in-program        | 3.0418134 | WORD |
| 6 | verification | WORD,USER | increses          | 3.0418134 | WORD |
| 6 | verification | WORD,USER | incubation        | 3.0418134 | WORD |
| 6 | verification | WORD,USER | indepement        | 3.0418134 | WORD |
| 6 | verification | WORD,USER | intermittent      | 3.0418134 | WORD |
| 6 | verification | WORD,USER | intnded           | 3.0418134 | WORD |
| 6 | verification | WORD,USER | involves          | 3.0418134 | WORD |
| 6 | verification | WORD,USER | irde              | 3.0418134 | WORD |
| 6 | verification | WORD,USER | keypunching       | 3.0418134 | WORD |
| 6 | verification | WORD,USER | ldation           | 3.0418134 | WORD |
| 6 | verification | WORD,USER | lflying           | 3.0418134 | WORD |
| 6 | verification | WORD,USER | logiq             | 3.0418134 | WORD |
| 6 | verification | WORD,USER | m9delling         | 3.0418134 | WORD |
| 6 | verification | WORD,USER | machine-oriented  | 3.0418134 | WORD |
| 6 | verification | WORD,USER | melodies          | 3.0418134 | WORD |
| 6 | verification | WORD,USER | mit               | 3.0418134 | WORD |
| 6 | verification | WORD,USER | models'of         | 3.0418134 | WORD |
| 6 | verification | WORD,USER | m9del's           | 3.0418134 | WORD |
| 6 | verification | WORD,USER | multidisciplinary | 3.0418134 | WORD |
| 6 | verification | WORD,USER | muti-stage        | 3.0418134 | WORD |
| 6 | verification | WORD,USER | nessitates        | 3.0418134 | WORD |
| 6 | verification | WORD,USER | nicely            | 3.0418134 | WORD |
| 6 | verification | WORD,USER | nning             | 3.0418134 | WORD |
| 6 | verification | WORD,USER | non-synchronous   | 3.0418134 | WORD |
| 6 | verification | WORD,USER | nonrandom         | 3.0418134 | WORD |

|   |              |           |                     |           |      |
|---|--------------|-----------|---------------------|-----------|------|
| 6 | verification | WORD,USER | oras                | 3.0418134 | WORD |
| 6 | verification | WORD,USER | othe'r              | 3.0418134 | WORD |
| 6 | verification | WORD,USER | outlining           | 3.0418134 | WORD |
| 6 | verification | WORD,USER | outweighed          | 3.0418134 | WORD |
| 6 | verification | WORD,USER | patchboards         | 3.0418134 | WORD |
| 6 | verification | WORD,USER | pel                 | 3.0418134 | WORD |
| 6 | verification | WORD,USER | perplexing          | 3.0418134 | WORD |
| 6 | verification | WORD,USER | pertains            | 3.0418134 | WORD |
| 6 | verification | WORD,USER | plies               | 3.0418134 | WORD |
| 6 | verification | WORD,USER | post-run            | 3.0418134 | WORD |
| 6 | verification | WORD,USER | pr-0pose            | 3.0418134 | WORD |
| 6 | verification | WORD,USER | practicably         | 3.0418134 | WORD |
| 6 | verification | WORD,USER | precede             | 3.0418134 | WORD |
| 6 | verification | WORD,USER | preceded            | 3.0418134 | WORD |
| 6 | verification | WORD,USER | pro9ram             | 3.0418134 | WORD |
| 6 | verification | WORD,USER | programmer-oriented | 3.0418134 | WORD |
| 6 | verification | WORD,USER | provisioning        | 3.0418134 | WORD |
| 6 | verification | WORD,USER | quicker             | 3.0418134 | WORD |
| 6 | verification | WORD,USER | r's                 | 3.0418134 | WORD |
| 6 | verification | WORD,USER | r-e                 | 3.0418134 | WORD |
| 6 | verification | WORD,USER | re-analysis         | 3.0418134 | WORD |
| 6 | verification | WORD,USER | re-verified         | 3.0418134 | WORD |
| 6 | verification | WORD,USER | rectitude           | 3.0418134 | WORD |
| 6 | verification | WORD,USER | regime              | 3.0418134 | WORD |
| 6 | verification | WORD,USER | rification          | 3.0418134 | WORD |
| 6 | verification | WORD,USER | routinely           | 3.0418134 | WORD |
| 6 | verification | WORD,USER | ruled               | 3.0418134 | WORD |
| 6 | verification | WORD,USER | samplirtg           | 3.0418134 | WORD |
| 6 | verification | WORD,USER | sarily              | 3.0418134 | WORD |
| 6 | verification | WORD,USER | scanty              | 3.0418134 | WORD |
| 6 | verification | WORD,USER | self                | 3.0418134 | WORD |
| 6 | verification | WORD,USER | simultaneously      | 3.0418134 | WORD |
| 6 | verification | WORD,USER | slso                | 3.0418134 | WORD |
| 6 | verification | WORD,USER | stic                | 3.0418134 | WORD |
| 6 | verification | WORD,USER | structur            | 3.0418134 | WORD |
| 6 | verification | WORD,USER | stuck-at            | 3.0418134 | WORD |
| 6 | verification | WORD,USER | stuck-at-zero       | 3.0418134 | WORD |
| 6 | verification | WORD,USER | stuckat-one         | 3.0418134 | WORD |

|                   |              |             |                |              |              |
|-------------------|--------------|-------------|----------------|--------------|--------------|
| 6                 | verification | WORD,USER   | subaccounts    | 3.0418134    | WORD         |
| 6                 | verification | WORD,USER   | subsidiary     | 3.0418134    | WORD         |
| 6                 | verification | WORD,USER   | the'μ's        | 3.0418134    | WORD         |
| 6                 | verification | WORD,USER   | three-value    | 3.0418134    | WORD         |
| 6                 | verification | WORD,USER   | topical        | 3.0418134    | WORD         |
| 6                 | verification | WORD,USER   | truefalse      | 3.0418134    | WORD         |
| 6                 | verification | WORD,USER   | tting          | 3.0418134    | WORD         |
| 6                 | verification | WORD,USER   | two-point      | 3.0418134    | WORD         |
| 6                 | verification | WORD,USER   | valtdity       | 3.0418134    | WORD         |
| 6                 | verification | WORD,USER   | witμ           | 3.0418134    | WORD         |
| 6                 | verification | WORD,USER   | yerif          | 3.0418134    | WORD         |
| 6                 | verification | WORD,USER   | yes-no         | 3.0418134    | WORD         |
| 6                 | verification | WORD,USER   | designer's     | 1.9963038    | WORD         |
| 6                 | verification | WORD,USER   | fine-tuning    | 1.9963038    | WORD         |
| 6                 | verification | WORD,USER   | multi-stage    | 1.9963038    | WORD         |
|                   |              |             |                |              |              |
|                   |              |             |                |              |              |
| <b>1980s.</b>     |              |             |                |              |              |
| <b>iterations</b> | <b>value</b> | <b>kind</b> | <b>word</b>    | <b>score</b> | <b>kind2</b> |
| 9                 | verification | WORD,USER   | verification   | 8.141953     | WORD         |
| 9                 | verification | WORD,USER   | possesses      | 5.3206515    | WORD         |
| 9                 | verification | WORD,USER   | rrodels        | 4.9648595    | WORD         |
| 9                 | verification | WORD,USER   | entails        | 4.59189      | WORD         |
| 9                 | verification | WORD,USER   | formality      | 4.359849     | WORD         |
| 9                 | verification | WORD,USER   | furthering     | 4.359849     | WORD         |
| 9                 | verification | WORD,USER   | substantiating | 4.359849     | WORD         |
| 9                 | verification | WORD,USER   | walk           | 4.359849     | WORD         |
| 9                 | verification | WORD,USER   | chamber        | 4.2061906    | WORD         |
| 9                 | verification | WORD,USER   | focussed       | 4.2061906    | WORD         |
| 9                 | verification | WORD,USER   | formulates     | 4.2061906    | WORD         |
| 9                 | verification | WORD,USER   | rrore          | 4.2061906    | WORD         |
| 9                 | verification | WORD,USER   | validates      | 4.2061906    | WORD         |
| 9                 | verification | WORD,USER   | breakpointing  | 4.008293     | WORD         |
| 9                 | verification | WORD,USER   | dtring         | 4.008293     | WORD         |
| 9                 | verification | WORD,USER   | faithful       | 4.008293     | WORD         |
| 9                 | verification | WORD,USER   | fielded        | 4.008293     | WORD         |
| 9                 | verification | WORD,USER   | non-simulators | 4.008293     | WORD         |
| 9                 | verification | WORD,USER   | positivism     | 4.008293     | WORD         |



|   |              |           |                     |           |      |
|---|--------------|-----------|---------------------|-----------|------|
| 9 | verification | WORD,USER | prograrrning        | 4.008293  | WORD |
| 9 | verification | WORD,USER | sirrolation         | 4.008293  | WORD |
| 9 | verification | WORD,USER | unclassified        | 4.008293  | WORD |
| 9 | verification | WORD,USER | 9systems            | 3.7296562 | WORD |
| 9 | verification | WORD,USER | absolve             | 3.7296562 | WORD |
| 9 | verification | WORD,USER | accountability      | 3.7296562 | WORD |
| 9 | verification | WORD,USER | activiti            | 3.7296562 | WORD |
| 9 | verification | WORD,USER | anlayst             | 3.7296562 | WORD |
| 9 | verification | WORD,USER | automata-theoretic  | 3.7296562 | WORD |
| 9 | verification | WORD,USER | aver                | 3.7296562 | WORD |
| 9 | verification | WORD,USER | behavior-mode       | 3.7296562 | WORD |
| 9 | verification | WORD,USER | bolstering          | 3.7296562 | WORD |
| 9 | verification | WORD,USER | categorically       | 3.7296562 | WORD |
| 9 | verification | WORD,USER | claiming            | 3.7296562 | WORD |
| 9 | verification | WORD,USER | cne                 | 3.7296562 | WORD |
| 9 | verification | WORD,USER | codify              | 3.7296562 | WORD |
| 9 | verification | WORD,USER | colliding           | 3.7296562 | WORD |
| 9 | verification | WORD,USER | computer-executable | 3.7296562 | WORD |
| 9 | verification | WORD,USER | conduc              | 3.7296562 | WORD |
| 9 | verification | WORD,USER | conductive          | 3.7296562 | WORD |
| 9 | verification | WORD,USER | confrontation       | 3.7296562 | WORD |
| 9 | verification | WORD,USER | conitions           | 3.7296562 | WORD |
| 9 | verification | WORD,USER | contaminate         | 3.7296562 | WORD |
| 9 | verification | WORD,USER | correponding        | 3.7296562 | WORD |
| 9 | verification | WORD,USER | corroborating       | 3.7296562 | WORD |
| 9 | verification | WORD,USER | culminated          | 3.7296562 | WORD |
| 9 | verification | WORD,USER | de&l                | 3.7296562 | WORD |
| 9 | verification | WORD,USER | deception           | 3.7296562 | WORD |
| 9 | verification | WORD,USER | delegate            | 3.7296562 | WORD |
| 9 | verification | WORD,USER | dence               | 3.7296562 | WORD |
| 9 | verification | WORD,USER | deougging           | 3.7296562 | WORD |
| 9 | verification | WORD,USER | derated             | 3.7296562 | WORD |
| 9 | verification | WORD,USER | descri              | 3.7296562 | WORD |
| 9 | verification | WORD,USER | deta                | 3.7296562 | WORD |
| 9 | verification | WORD,USER | developer's         | 3.7296562 | WORD |
| 9 | verification | WORD,USER | dissect             | 3.7296562 | WORD |
| 9 | verification | WORD,USER | elapses             | 3.7296562 | WORD |
| 9 | verification | WORD,USER | empi                | 3.7296562 | WORD |



|   |              |           |                       |           |      |
|---|--------------|-----------|-----------------------|-----------|------|
| 9 | verification | WORD,USER | empiricists           | 3.7296562 | WORD |
| 9 | verification | WORD,USER | ensured               | 3.7296562 | WORD |
| 9 | verification | WORD,USER | entailing             | 3.7296562 | WORD |
| 9 | verification | WORD,USER | epochs                | 3.7296562 | WORD |
| 9 | verification | WORD,USER | equ                   | 3.7296562 | WORD |
| 9 | verification | WORD,USER | exper                 | 3.7296562 | WORD |
| 9 | verification | WORD,USER | falsificationist      | 3.7296562 | WORD |
| 9 | verification | WORD,USER | films                 | 3.7296562 | WORD |
| 9 | verification | WORD,USER | firer-target          | 3.7296562 | WORD |
| 9 | verification | WORD,USER | flowcharts            | 3.7296562 | WORD |
| 9 | verification | WORD,USER | flowed                | 3.7296562 | WORD |
| 9 | verification | WORD,USER | folllwing             | 3.7296562 | WORD |
| 9 | verification | WORD,USER | ften                  | 3.7296562 | WORD |
| 9 | verification | WORD,USER | ges                   | 3.7296562 | WORD |
| 9 | verification | WORD,USER | gineering             | 3.7296562 | WORD |
| 9 | verification | WORD,USER | hinted                | 3.7296562 | WORD |
| 9 | verification | WORD,USER | histoqrms             | 3.7296562 | WORD |
| 9 | verification | WORD,USER | historian             | 3.7296562 | WORD |
| 9 | verification | WORD,USER | hurt                  | 3.7296562 | WORD |
| 9 | verification | WORD,USER | ilrooms               | 3.7296562 | WORD |
| 9 | verification | WORD,USER | infonnally            | 3.7296562 | WORD |
| 9 | verification | WORD,USER | infrequent            | 3.7296562 | WORD |
| 9 | verification | WORD,USER | inp                   | 3.7296562 | WORD |
| 9 | verification | WORD,USER | instrumentation-based | 3.7296562 | WORD |
| 9 | verification | WORD,USER | involnent             | 3.7296562 | WORD |
| 9 | verification | WORD,USER | itate                 | 3.7296562 | WORD |
| 9 | verification | WORD,USER | lamda                 | 3.7296562 | WORD |
| 9 | verification | WORD,USER | linkers               | 3.7296562 | WORD |
| 9 | verification | WORD,USER | logics                | 3.7296562 | WORD |
| 9 | verification | WORD,USER | ltldeling             | 3.7296562 | WORD |
| 9 | verification | WORD,USER | mathematical          | 3.7296562 | WORD |
| 9 | verification | WORD,USER | mixtures              | 3.7296562 | WORD |
| 9 | verification | WORD,USER | model-building        | 3.7296562 | WORD |
| 9 | verification | WORD,USER | moqel                 | 3.7296562 | WORD |
| 9 | verification | WORD,USER | neural                | 3.7296562 | WORD |
| 9 | verification | WORD,USER | nical                 | 3.7296562 | WORD |
| 9 | verification | WORD,USER | nonsimulationists     | 3.7296562 | WORD |
| 9 | verification | WORD,USER | oodel                 | 3.7296562 | WORD |

|   |              |           |                    |           |      |
|---|--------------|-----------|--------------------|-----------|------|
| 9 | verification | WORD,USER | oped               | 3.7296562 | WORD |
| 9 | verification | WORD,USER | opical             | 3.7296562 | WORD |
| 9 | verification | WORD,USER | paraphrase         | 3.7296562 | WORD |
| 9 | verification | WORD,USER | pulls              | 3.7296562 | WORD |
| 9 | verification | WORD,USER | reap               | 3.7296562 | WORD |
| 9 | verification | WORD,USER | reasonable         | 3.7296562 | WORD |
| 9 | verification | WORD,USER | rectified          | 3.7296562 | WORD |
| 9 | verification | WORD,USER | referee            | 3.7296562 | WORD |
| 9 | verification | WORD,USER | reflexions         | 3.7296562 | WORD |
| 9 | verification | WORD,USER | relegated          | 3.7296562 | WORD |
| 9 | verification | WORD,USER | resent             | 3.7296562 | WORD |
| 9 | verification | WORD,USER | retested           | 3.7296562 | WORD |
| 9 | verification | WORD,USER | revolutions        | 3.7296562 | WORD |
| 9 | verification | WORD,USER | rr1                | 3.7296562 | WORD |
| 9 | verification | WORD,USER | rrost              | 3.7296562 | WORD |
| 9 | verification | WORD,USER | sdb                | 3.7296562 | WORD |
| 9 | verification | WORD,USER | seventies          | 3.7296562 | WORD |
| 9 | verification | WORD,USER | shuffling          | 3.7296562 | WORD |
| 9 | verification | WORD,USER | simulation-related | 3.7296562 | WORD |
| 9 | verification | WORD,USER | slavish            | 3.7296562 | WORD |
| 9 | verification | WORD,USER | standalone         | 3.7296562 | WORD |
| 9 | verification | WORD,USER | stemming           | 3.7296562 | WORD |
| 9 | verification | WORD,USER | strengthened       | 3.7296562 | WORD |
| 9 | verification | WORD,USER | striving           | 3.7296562 | WORD |
| 9 | verification | WORD,USER | tci                | 3.7296562 | WORD |
| 9 | verification | WORD,USER | therein            | 3.7296562 | WORD |
| 9 | verification | WORD,USER | tide               | 3.7296562 | WORD |
| 9 | verification | WORD,USER | touches            | 3.7296562 | WORD |
| 9 | verification | WORD,USER | udy                | 3.7296562 | WORD |
| 9 | verification | WORD,USER | ues                | 3.7296562 | WORD |
| 9 | verification | WORD,USER | unt                | 3.7296562 | WORD |
| 9 | verification | WORD,USER | walk-throughs      | 3.7296562 | WORD |
| 9 | verification | WORD,USER | watches            | 3.7296562 | WORD |
| 9 | verification | WORD,USER | wholly             | 3.7296562 | WORD |
| 9 | verification | WORD,USER | wires              | 3.7296562 | WORD |
| 9 | verification | WORD,USER | witli              | 3.7296562 | WORD |
| 9 | verification | WORD,USER | instrumentalism    | 3.2538166 | WORD |
| 9 | verification | WORD,USER | substantiation     | 3.0663395 | WORD |

|                   |              |             |                    |              |              |
|-------------------|--------------|-------------|--------------------|--------------|--------------|
| 9                 | verification | WORD,USER   | continuation       | 2.9071023    | WORD         |
| 9                 | verification | WORD,USER   | echo               | 2.9071023    | WORD         |
| 9                 | verification | WORD,USER   | simulation         | 2.8333216    | WORD         |
| 9                 | verification | WORD,USER   | reproducing        | 2.6277688    | WORD         |
| 9                 | verification | WORD,USER   | ensuring           | 2.6188927    | WORD         |
| 9                 | verification | WORD,USER   | ascertaining       | 2.4298708    | WORD         |
| 9                 | verification | WORD,USER   | categorizes        | 2.4298708    | WORD         |
| 9                 | verification | WORD,USER   | sh                 | 2.4298708    | WORD         |
| 9                 | verification | WORD,USER   | tistical           | 2.4298708    | WORD         |
| 9                 | verification | WORD,USER   | stepping           | 2.3062618    | WORD         |
| 9                 | verification | WORD,USER   | practicality       | 2.1526036    | WORD         |
| 9                 | verification | WORD,USER   | modeling           | 2.1526036    | WORD         |
| 9                 | verification | WORD,USER   | adb                | 2.151234     | WORD         |
| 9                 | verification | WORD,USER   | defaulted          | 2.151234     | WORD         |
| 9                 | verification | WORD,USER   | undertake          | 2.151234     | WORD         |
|                   |              |             |                    |              |              |
|                   |              |             |                    |              |              |
| <b>1990s.</b>     |              |             |                    |              |              |
| <b>iterations</b> | <b>value</b> | <b>kind</b> | <b>word</b>        | <b>score</b> | <b>kind2</b> |
| 10                | verification | WORD,USER   | verification       | 6.1748385    | WORD         |
| 10                | verification | WORD,USER   | validation         | 6.130572     | WORD         |
| 10                | verification | WORD,USER   | veri               | 5.9661365    | WORD         |
| 10                | verification | WORD,USER   | assuring           | 5.073945     | WORD         |
| 10                | verification | WORD,USER   | empiricism         | 4.861838     | WORD         |
| 10                | verification | WORD,USER   | substantiation     | 4.861838     | WORD         |
| 10                | verification | WORD,USER   | rationalism        | 4.775063     | WORD         |
| 10                | verification | WORD,USER   | quicker            | 4.6767244    | WORD         |
| 10                | verification | WORD,USER   | structure-oriented | 4.6767244    | WORD         |
| 10                | verification | WORD,USER   | substantiating     | 4.6767244    | WORD         |
| 10                | verification | WORD,USER   | multi-step         | 4.563246     | WORD         |
| 10                | verification | WORD,USER   | architects         | 4.4290814    | WORD         |
| 10                | verification | WORD,USER   | classi             | 4.4290814    | WORD         |
| 10                | verification | WORD,USER   | co-developed       | 4.4290814    | WORD         |
| 10                | verification | WORD,USER   | impediments        | 4.4290814    | WORD         |
| 10                | verification | WORD,USER   | instrumentalist    | 4.4290814    | WORD         |
| 10                | verification | WORD,USER   | methodical         | 4.4290814    | WORD         |
| 10                | verification | WORD,USER   | post-construction  | 4.4290814    | WORD         |
| 10                | verification | WORD,USER   | reproducible       | 4.4290814    | WORD         |

|    |              |           |                      |           |      |
|----|--------------|-----------|----------------------|-----------|------|
| 10 | verification | WORD,USER | reprogramming        | 4.4290814 | WORD |
| 10 | verification | WORD,USER | software-in-the-loop | 4.4290814 | WORD |
| 10 | verification | WORD,USER | approves             | 4.2649426 | WORD |
| 10 | verification | WORD,USER | ascertaining         | 4.2649426 | WORD |
| 10 | verification | WORD,USER | culminated           | 4.2649426 | WORD |
| 10 | verification | WORD,USER | idealised            | 4.2649426 | WORD |
| 10 | verification | WORD,USER | inconvenient         | 4.2649426 | WORD |
| 10 | verification | WORD,USER | meso                 | 4.2649426 | WORD |
| 10 | verification | WORD,USER | cation               | 4.259617  | WORD |
| 10 | verification | WORD,USER | analysiddesign       | 4.053414  | WORD |
| 10 | verification | WORD,USER | certi                | 4.053414  | WORD |
| 10 | verification | WORD,USER | confederations       | 4.053414  | WORD |
| 10 | verification | WORD,USER | confrontational      | 4.053414  | WORD |
| 10 | verification | WORD,USER | conventionalistic    | 4.053414  | WORD |
| 10 | verification | WORD,USER | correspondences      | 4.053414  | WORD |
| 10 | verification | WORD,USER | critics              | 4.053414  | WORD |
| 10 | verification | WORD,USER | critiques            | 4.053414  | WORD |
| 10 | verification | WORD,USER | direct-structure     | 4.053414  | WORD |
| 10 | verification | WORD,USER | dismissed            | 4.053414  | WORD |
| 10 | verification | WORD,USER | hasten               | 4.053414  | WORD |
| 10 | verification | WORD,USER | illuminates          | 4.053414  | WORD |
| 10 | verification | WORD,USER | informality          | 4.053414  | WORD |
| 10 | verification | WORD,USER | inhibit              | 4.053414  | WORD |
| 10 | verification | WORD,USER | initiator            | 4.053414  | WORD |
| 10 | verification | WORD,USER | man-in               | 4.053414  | WORD |
| 10 | verification | WORD,USER | model-test-model     | 4.053414  | WORD |
| 10 | verification | WORD,USER | post-condition       | 4.053414  | WORD |
| 10 | verification | WORD,USER | refutation           | 4.053414  | WORD |
| 10 | verification | WORD,USER | regressing           | 4.053414  | WORD |
| 10 | verification | WORD,USER | revalidated          | 4.053414  | WORD |
| 10 | verification | WORD,USER | revalidations        | 4.053414  | WORD |
| 10 | verification | WORD,USER | revolutionized       | 4.053414  | WORD |
| 10 | verification | WORD,USER | simulation-model     | 4.053414  | WORD |
| 10 | verification | WORD,USER | specificity          | 4.053414  | WORD |
| 10 | verification | WORD,USER | strengthens          | 4.053414  | WORD |
| 10 | verification | WORD,USER | suites               | 4.053414  | WORD |
| 10 | verification | WORD,USER | undocumented         | 4.053414  | WORD |
| 10 | verification | WORD,USER | vee                  | 4.053414  | WORD |

|    |              |           |                   |           |      |
|----|--------------|-----------|-------------------|-----------|------|
| 10 | verification | WORD,USER | whisker           | 4.053414  | WORD |
| 10 | verification | WORD,USER | wildly            | 4.053414  | WORD |
| 10 | verification | WORD,USER | absolutist        | 3.7553992 | WORD |
| 10 | verification | WORD,USER | advises           | 3.7553992 | WORD |
| 10 | verification | WORD,USER | alternati         | 3.7553992 | WORD |
| 10 | verification | WORD,USER | audits            | 3.7553992 | WORD |
| 10 | verification | WORD,USER | beta-testing      | 3.7553992 | WORD |
| 10 | verification | WORD,USER | bore              | 3.7553992 | WORD |
| 10 | verification | WORD,USER | byproduct         | 3.7553992 | WORD |
| 10 | verification | WORD,USER | clarifies         | 3.7553992 | WORD |
| 10 | verification | WORD,USER | color-coded       | 3.7553992 | WORD |
| 10 | verification | WORD,USER | compositional     | 3.7553992 | WORD |
| 10 | verification | WORD,USER | crowds            | 3.7553992 | WORD |
| 10 | verification | WORD,USER | data-input        | 3.7553992 | WORD |
| 10 | verification | WORD,USER | deductions        | 3.7553992 | WORD |
| 10 | verification | WORD,USER | eigenvector       | 3.7553992 | WORD |
| 10 | verification | WORD,USER | emitters          | 3.7553992 | WORD |
| 10 | verification | WORD,USER | etal              | 3.7553992 | WORD |
| 10 | verification | WORD,USER | fears             | 3.7553992 | WORD |
| 10 | verification | WORD,USER | footnotes         | 3.7553992 | WORD |
| 10 | verification | WORD,USER | formalising       | 3.7553992 | WORD |
| 10 | verification | WORD,USER | ground-truth      | 3.7553992 | WORD |
| 10 | verification | WORD,USER | holdings          | 3.7553992 | WORD |
| 10 | verification | WORD,USER | hole              | 3.7553992 | WORD |
| 10 | verification | WORD,USER | illogical         | 3.7553992 | WORD |
| 10 | verification | WORD,USER | initialisation    | 3.7553992 | WORD |
| 10 | verification | WORD,USER | institutionalizes | 3.7553992 | WORD |
| 10 | verification | WORD,USER | intermingled      | 3.7553992 | WORD |
| 10 | verification | WORD,USER | knowledgebase     | 3.7553992 | WORD |
| 10 | verification | WORD,USER | liberally         | 3.7553992 | WORD |
| 10 | verification | WORD,USER | meaningfulness    | 3.7553992 | WORD |
| 10 | verification | WORD,USER | methodically      | 3.7553992 | WORD |
| 10 | verification | WORD,USER | mimicking         | 3.7553992 | WORD |
| 10 | verification | WORD,USER | morphological     | 3.7553992 | WORD |
| 10 | verification | WORD,USER | myths             | 3.7553992 | WORD |
| 10 | verification | WORD,USER | non-modelers      | 3.7553992 | WORD |
| 10 | verification | WORD,USER | positivism        | 3.7553992 | WORD |
| 10 | verification | WORD,USER | pre-emption       | 3.7553992 | WORD |

|    |              |           |                        |           |      |
|----|--------------|-----------|------------------------|-----------|------|
| 10 | verification | WORD,USER | pretest                | 3.7553992 | WORD |
| 10 | verification | WORD,USER | producer's             | 3.7553992 | WORD |
| 10 | verification | WORD,USER | project's              | 3.7553992 | WORD |
| 10 | verification | WORD,USER | quadrant               | 3.7553992 | WORD |
| 10 | verification | WORD,USER | sideby-side            | 3.7553992 | WORD |
| 10 | verification | WORD,USER | specification-oriented | 3.7553992 | WORD |
| 10 | verification | WORD,USER | study's                | 3.7553992 | WORD |
| 10 | verification | WORD,USER | subjecting             | 3.7553992 | WORD |
| 10 | verification | WORD,USER | systolic               | 3.7553992 | WORD |
| 10 | verification | WORD,USER | tantamount             | 3.7553992 | WORD |
| 10 | verification | WORD,USER | umbrella               | 3.7553992 | WORD |
| 10 | verification | WORD,USER | uneconomical           | 3.7553992 | WORD |
| 10 | verification | WORD,USER | unproductive           | 3.7553992 | WORD |
| 10 | verification | WORD,USER | unvalidatable          | 3.7553992 | WORD |
| 10 | verification | WORD,USER | visually-based         | 3.7553992 | WORD |
| 10 | verification | WORD,USER | write-up               | 3.7553992 | WORD |
| 10 | verification | WORD,USER | σy                     | 3.7553992 | WORD |
| 10 | verification | WORD,USER | σω                     | 3.7553992 | WORD |
| 10 | verification | WORD,USER | verifiable             | 3.2487233 | WORD |
| 10 | verification | WORD,USER | abreast                | 3.2461436 | WORD |
| 10 | verification | WORD,USER | authentication         | 3.2461436 | WORD |
| 10 | verification | WORD,USER | battlefields           | 3.2461436 | WORD |
| 10 | verification | WORD,USER | behavior's             | 3.2461436 | WORD |
| 10 | verification | WORD,USER | blends                 | 3.2461436 | WORD |
| 10 | verification | WORD,USER | bug-free               | 3.2461436 | WORD |
| 10 | verification | WORD,USER | checkers               | 3.2461436 | WORD |
| 10 | verification | WORD,USER | co-chairs              | 3.2461436 | WORD |
| 10 | verification | WORD,USER | complexes              | 3.2461436 | WORD |
| 10 | verification | WORD,USER | conceptualise          | 3.2461436 | WORD |
| 10 | verification | WORD,USER | confinn                | 3.2461436 | WORD |
| 10 | verification | WORD,USER | contended              | 3.2461436 | WORD |
| 10 | verification | WORD,USER | cross-validation       | 3.2461436 | WORD |
| 10 | verification | WORD,USER | day's                  | 3.2461436 | WORD |
| 10 | verification | WORD,USER | decisively             | 3.2461436 | WORD |
| 10 | verification | WORD,USER | descending             | 3.2461436 | WORD |
| 10 | verification | WORD,USER | deteriorated           | 3.2461436 | WORD |
| 10 | verification | WORD,USER | deviated               | 3.2461436 | WORD |
| 10 | verification | WORD,USER | divergences            | 3.2461436 | WORD |



|    |              |           |                    |           |      |
|----|--------------|-----------|--------------------|-----------|------|
| 10 | verification | WORD,USER | easy-to-understand | 3.2461436 | WORD |
| 10 | verification | WORD,USER | fulfils            | 3.2461436 | WORD |
| 10 | verification | WORD,USER | grading            | 3.2461436 | WORD |
| 10 | verification | WORD,USER | hears              | 3.2461436 | WORD |
| 10 | verification | WORD,USER | holdout            | 3.2461436 | WORD |
| 10 | verification | WORD,USER | hopeful            | 3.2461436 | WORD |
| 10 | verification | WORD,USER | idation            | 3.2461436 | WORD |
| 10 | verification | WORD,USER | inadequacy         | 3.2461436 | WORD |
| 10 | verification | WORD,USER | incumbent          | 3.2461436 | WORD |
| 10 | verification | WORD,USER | laborious          | 3.2461436 | WORD |
| 10 | verification | WORD,USER | lamented           | 3.2461436 | WORD |
| 10 | verification | WORD,USER | loses              | 3.2461436 | WORD |
| 10 | verification | WORD,USER | manageability      | 3.2461436 | WORD |
| 10 | verification | WORD,USER | meticulous         | 3.2461436 | WORD |
| 10 | verification | WORD,USER | mirrored           | 3.2461436 | WORD |
| 10 | verification | WORD,USER | moderators         | 3.2461436 | WORD |
| 10 | verification | WORD,USER | mph                | 3.2461436 | WORD |
| 10 | verification | WORD,USER | mutation           | 3.2461436 | WORD |
| 10 | verification | WORD,USER | non-native         | 3.2461436 | WORD |
| 10 | verification | WORD,USER | notoriously        | 3.2461436 | WORD |
| 10 | verification | WORD,USER | organization's     | 3.2461436 | WORD |
| 10 | verification | WORD,USER | organizer          | 3.2461436 | WORD |
| 10 | verification | WORD,USER | owchart            | 3.2461436 | WORD |
| 10 | verification | WORD,USER | patrolling         | 3.2461436 | WORD |
| 10 | verification | WORD,USER | peculiarities      | 3.2461436 | WORD |
| 10 | verification | WORD,USER | perspicuity        | 3.2461436 | WORD |
| 10 | verification | WORD,USER | plethora           | 3.2461436 | WORD |
| 10 | verification | WORD,USER | pre-specified      | 3.2461436 | WORD |
| 10 | verification | WORD,USER | primacy            | 3.2461436 | WORD |
| 10 | verification | WORD,USER | reaped             | 3.2461436 | WORD |
| 10 | verification | WORD,USER | regressions        | 3.2461436 | WORD |
| 10 | verification | WORD,USER | repairman          | 3.2461436 | WORD |
| 10 | verification | WORD,USER | self-similarity    | 3.2461436 | WORD |
| 10 | verification | WORD,USER | shortens           | 3.2461436 | WORD |
| 10 | verification | WORD,USER | signal-to-noise    | 3.2461436 | WORD |
| 10 | verification | WORD,USER | situation-specific | 3.2461436 | WORD |
| 10 | verification | WORD,USER | soul               | 3.2461436 | WORD |
| 10 | verification | WORD,USER | stakeholder's      | 3.2461436 | WORD |



|                   |              |             |                         |              |              |
|-------------------|--------------|-------------|-------------------------|--------------|--------------|
| 10                | verification | WORD,USER   | standards-based         | 3.2461436    | WORD         |
| 10                | verification | WORD,USER   | t-statistic             | 3.2461436    | WORD         |
| 10                | verification | WORD,USER   | talces                  | 3.2461436    | WORD         |
| 10                | verification | WORD,USER   | the-loop                | 3.2461436    | WORD         |
| 10                | verification | WORD,USER   | toplevel                | 3.2461436    | WORD         |
| 10                | verification | WORD,USER   | triumph                 | 3.2461436    | WORD         |
| 10                | verification | WORD,USER   | two-man                 | 3.2461436    | WORD         |
| 10                | verification | WORD,USER   | unachievable            | 3.2461436    | WORD         |
| 10                | verification | WORD,USER   | underwent               | 3.2461436    | WORD         |
| 10                | verification | WORD,USER   | user-controlled         | 3.2461436    | WORD         |
| 10                | verification | WORD,USER   | v1                      | 3.2461436    | WORD         |
| 10                | verification | WORD,USER   | variability-sensitivity | 3.2461436    | WORD         |
| 10                | verification | WORD,USER   | wary                    | 3.2461436    | WORD         |
| 10                | verification | WORD,USER   | ˘                       | 3.2461436    | WORD         |
| 10                | verification | WORD,USER   | schemas                 | 2.872478     | WORD         |
| 10                | verification | WORD,USER   | surveyed                | 2.7383137    | WORD         |
| 10                | verification | WORD,USER   | multistage              | 2.5764554    | WORD         |
| 10                | verification | WORD,USER   | endless                 | 2.574175     | WORD         |
| 10                | verification | WORD,USER   | gleaned                 | 2.574175     | WORD         |
| 10                | verification | WORD,USER   | mediation               | 2.574175     | WORD         |
| 10                | verification | WORD,USER   | plausibility            | 2.362646     | WORD         |
| 10                | verification | WORD,USER   | complied                | 2.0646312    | WORD         |
| 10                | verification | WORD,USER   | complimentary           | 2.0646312    | WORD         |
| 10                | verification | WORD,USER   | sealing                 | 2.0646312    | WORD         |
| 10                | verification | WORD,USER   | sensation               | 2.0646312    | WORD         |
| 10                | verification | WORD,USER   | unintentional           | 2.0646312    | WORD         |
| 10                | verification | WORD,USER   | prolonged               | 1.853665     | WORD         |
|                   |              |             |                         |              |              |
|                   |              |             |                         |              |              |
| <b>2000s.</b>     |              |             |                         |              |              |
| <b>iterations</b> | <b>value</b> | <b>kind</b> | <b>word</b>             | <b>score</b> | <b>kind2</b> |
| 9                 | verification | WORD,USER   | validation              | 6.136519     | WORD         |
| 9                 | verification | WORD,USER   | verification            | 6.039942     | WORD         |
| 9                 | verification | WORD,USER   | contingent              | 4.750617     | WORD         |
| 9                 | verification | WORD,USER   | walkthroughs            | 4.5700154    | WORD         |
| 9                 | verification | WORD,USER   | ascertaining            | 4.459303     | WORD         |
| 9                 | verification | WORD,USER   | formalisation           | 4.459303     | WORD         |
| 9                 | verification | WORD,USER   | gradebreaks             | 4.459303     | WORD         |

|   |              |           |                  |           |      |
|---|--------------|-----------|------------------|-----------|------|
| 9 | verification | WORD,USER | revalidation     | 4.459303  | WORD |
| 9 | verification | WORD,USER | intentionality   | 4.32841   | WORD |
| 9 | verification | WORD,USER | crosswalk        | 4.1682734 | WORD |
| 9 | verification | WORD,USER | illuminates      | 4.1682734 | WORD |
| 9 | verification | WORD,USER | reprogramming    | 4.1682734 | WORD |
| 9 | verification | WORD,USER | toplevel         | 4.1682734 | WORD |
| 9 | verification | WORD,USER | verity           | 4.1682734 | WORD |
| 9 | verification | WORD,USER | conceptual-model | 3.961904  | WORD |
| 9 | verification | WORD,USER | confidences      | 3.961904  | WORD |
| 9 | verification | WORD,USER | data-poor        | 3.961904  | WORD |
| 9 | verification | WORD,USER | data-rich        | 3.961904  | WORD |
| 9 | verification | WORD,USER | descends         | 3.961904  | WORD |
| 9 | verification | WORD,USER | discriminant     | 3.961904  | WORD |
| 9 | verification | WORD,USER | empiricism       | 3.961904  | WORD |
| 9 | verification | WORD,USER | empiricist       | 3.961904  | WORD |
| 9 | verification | WORD,USER | generalizable    | 3.961904  | WORD |
| 9 | verification | WORD,USER | knowledgebased   | 3.961904  | WORD |
| 9 | verification | WORD,USER | meta-component   | 3.961904  | WORD |
| 9 | verification | WORD,USER | non-statistical  | 3.961904  | WORD |
| 9 | verification | WORD,USER | provenance       | 3.961904  | WORD |
| 9 | verification | WORD,USER | rationalism      | 3.961904  | WORD |
| 9 | verification | WORD,USER | rationalist      | 3.961904  | WORD |
| 9 | verification | WORD,USER | relativist       | 3.961904  | WORD |
| 9 | verification | WORD,USER | scrupulous       | 3.961904  | WORD |
| 9 | verification | WORD,USER | truthfulness     | 3.961904  | WORD |
| 9 | verification | WORD,USER | accreditations   | 3.6711588 | WORD |
| 9 | verification | WORD,USER | addendum         | 3.6711588 | WORD |
| 9 | verification | WORD,USER | agreeing         | 3.6711588 | WORD |
| 9 | verification | WORD,USER | air-traffic      | 3.6711588 | WORD |
| 9 | verification | WORD,USER | allergic         | 3.6711588 | WORD |
| 9 | verification | WORD,USER | breakpoint       | 3.6711588 | WORD |
| 9 | verification | WORD,USER | bulletin         | 3.6711588 | WORD |
| 9 | verification | WORD,USER | co-exist         | 3.6711588 | WORD |
| 9 | verification | WORD,USER | coder            | 3.6711588 | WORD |
| 9 | verification | WORD,USER | communiqués      | 3.6711588 | WORD |
| 9 | verification | WORD,USER | comprehensible   | 3.6711588 | WORD |
| 9 | verification | WORD,USER | compressed       | 3.6711588 | WORD |
| 9 | verification | WORD,USER | compressing      | 3.6711588 | WORD |

|   |              |           |                           |           |      |
|---|--------------|-----------|---------------------------|-----------|------|
| 9 | verification | WORD,USER | contemporaneous           | 3.6711588 | WORD |
| 9 | verification | WORD,USER | devel                     | 3.6711588 | WORD |
| 9 | verification | WORD,USER | diligent                  | 3.6711588 | WORD |
| 9 | verification | WORD,USER | disaggregating            | 3.6711588 | WORD |
| 9 | verification | WORD,USER | documentary               | 3.6711588 | WORD |
| 9 | verification | WORD,USER | domain-experts            | 3.6711588 | WORD |
| 9 | verification | WORD,USER | els                       | 3.6711588 | WORD |
| 9 | verification | WORD,USER | evaluative                | 3.6711588 | WORD |
| 9 | verification | WORD,USER | explicit-state            | 3.6711588 | WORD |
| 9 | verification | WORD,USER | expository                | 3.6711588 | WORD |
| 9 | verification | WORD,USER | extrema                   | 3.6711588 | WORD |
| 9 | verification | WORD,USER | extreme-conditions        | 3.6711588 | WORD |
| 9 | verification | WORD,USER | finalizing                | 3.6711588 | WORD |
| 9 | verification | WORD,USER | foundationalist           | 3.6711588 | WORD |
| 9 | verification | WORD,USER | holographic               | 3.6711588 | WORD |
| 9 | verification | WORD,USER | in-class                  | 3.6711588 | WORD |
| 9 | verification | WORD,USER | in-place                  | 3.6711588 | WORD |
| 9 | verification | WORD,USER | keying                    | 3.6711588 | WORD |
| 9 | verification | WORD,USER | lls                       | 3.6711588 | WORD |
| 9 | verification | WORD,USER | machine-readable          | 3.6711588 | WORD |
| 9 | verification | WORD,USER | makefiles                 | 3.6711588 | WORD |
| 9 | verification | WORD,USER | most-important            | 3.6711588 | WORD |
| 9 | verification | WORD,USER | multi-processor           | 3.6711588 | WORD |
| 9 | verification | WORD,USER | navigated                 | 3.6711588 | WORD |
| 9 | verification | WORD,USER | negating                  | 3.6711588 | WORD |
| 9 | verification | WORD,USER | nonexistent               | 3.6711588 | WORD |
| 9 | verification | WORD,USER | onus                      | 3.6711588 | WORD |
| 9 | verification | WORD,USER | organization's            | 3.6711588 | WORD |
| 9 | verification | WORD,USER | ply                       | 3.6711588 | WORD |
| 9 | verification | WORD,USER | programmatics             | 3.6711588 | WORD |
| 9 | verification | WORD,USER | quotes                    | 3.6711588 | WORD |
| 9 | verification | WORD,USER | redactor                  | 3.6711588 | WORD |
| 9 | verification | WORD,USER | researcher's              | 3.6711588 | WORD |
| 9 | verification | WORD,USER | ripple                    | 3.6711588 | WORD |
| 9 | verification | WORD,USER | seasoned                  | 3.6711588 | WORD |
| 9 | verification | WORD,USER | software-in-the-loop      | 3.6711588 | WORD |
| 9 | verification | WORD,USER | specification-calibration | 3.6711588 | WORD |
| 9 | verification | WORD,USER | standardizes              | 3.6711588 | WORD |

|   |              |           |                         |           |      |
|---|--------------|-----------|-------------------------|-----------|------|
| 9 | verification | WORD,USER | sub-modules             | 3.6711588 | WORD |
| 9 | verification | WORD,USER | synthers                | 3.6711588 | WORD |
| 9 | verification | WORD,USER | table-based             | 3.6711588 | WORD |
| 9 | verification | WORD,USER | tampering               | 3.6711588 | WORD |
| 9 | verification | WORD,USER | teamed                  | 3.6711588 | WORD |
| 9 | verification | WORD,USER | terabyte                | 3.6711588 | WORD |
| 9 | verification | WORD,USER | time-flow               | 3.6711588 | WORD |
| 9 | verification | WORD,USER | tool-set                | 3.6711588 | WORD |
| 9 | verification | WORD,USER | touches                 | 3.6711588 | WORD |
| 9 | verification | WORD,USER | transacted              | 3.6711588 | WORD |
| 9 | verification | WORD,USER | unsure                  | 3.6711588 | WORD |
| 9 | verification | WORD,USER | unsustainable           | 3.6711588 | WORD |
| 9 | verification | WORD,USER | variability-sensitivity | 3.6711588 | WORD |
| 9 | verification | WORD,USER | advises                 | 3.1743276 | WORD |
| 9 | verification | WORD,USER | alleged                 | 3.1743276 | WORD |
| 9 | verification | WORD,USER | alternated              | 3.1743276 | WORD |
| 9 | verification | WORD,USER | amalgamation            | 3.1743276 | WORD |
| 9 | verification | WORD,USER | anchors                 | 3.1743276 | WORD |
| 9 | verification | WORD,USER | andre                   | 3.1743276 | WORD |
| 9 | verification | WORD,USER | archaeological          | 3.1743276 | WORD |
| 9 | verification | WORD,USER | automaticall            | 3.1743276 | WORD |
| 9 | verification | WORD,USER | back-propagation        | 3.1743276 | WORD |
| 9 | verification | WORD,USER | battlespaces            | 3.1743276 | WORD |
| 9 | verification | WORD,USER | behavior-sensitivity    | 3.1743276 | WORD |
| 9 | verification | WORD,USER | bhr                     | 3.1743276 | WORD |
| 9 | verification | WORD,USER | binaries                | 3.1743276 | WORD |
| 9 | verification | WORD,USER | boxing                  | 3.1743276 | WORD |
| 9 | verification | WORD,USER | cementing               | 3.1743276 | WORD |
| 9 | verification | WORD,USER | cha                     | 3.1743276 | WORD |
| 9 | verification | WORD,USER | citations               | 3.1743276 | WORD |
| 9 | verification | WORD,USER | clearness               | 3.1743276 | WORD |
| 9 | verification | WORD,USER | co-chaired              | 3.1743276 | WORD |
| 9 | verification | WORD,USER | cognizance              | 3.1743276 | WORD |
| 9 | verification | WORD,USER | collectable             | 3.1743276 | WORD |
| 9 | verification | WORD,USER | combats                 | 3.1743276 | WORD |
| 9 | verification | WORD,USER | commercialization       | 3.1743276 | WORD |
| 9 | verification | WORD,USER | computerization         | 3.1743276 | WORD |
| 9 | verification | WORD,USER | conflated               | 3.1743276 | WORD |

|   |              |           |                      |           |      |
|---|--------------|-----------|----------------------|-----------|------|
| 9 | verification | WORD,USER | conversational       | 3.1743276 | WORD |
| 9 | verification | WORD,USER | corroborate          | 3.1743276 | WORD |
| 9 | verification | WORD,USER | cost-risk            | 3.1743276 | WORD |
| 9 | verification | WORD,USER | costeffectiveness    | 3.1743276 | WORD |
| 9 | verification | WORD,USER | costrisk             | 3.1743276 | WORD |
| 9 | verification | WORD,USER | counter-part         | 3.1743276 | WORD |
| 9 | verification | WORD,USER | cross-element        | 3.1743276 | WORD |
| 9 | verification | WORD,USER | cross-model          | 3.1743276 | WORD |
| 9 | verification | WORD,USER | decidedly            | 3.1743276 | WORD |
| 9 | verification | WORD,USER | deepening            | 3.1743276 | WORD |
| 9 | verification | WORD,USER | dential              | 3.1743276 | WORD |
| 9 | verification | WORD,USER | developerworks       | 3.1743276 | WORD |
| 9 | verification | WORD,USER | discriminated        | 3.1743276 | WORD |
| 9 | verification | WORD,USER | distillation         | 3.1743276 | WORD |
| 9 | verification | WORD,USER | diversely            | 3.1743276 | WORD |
| 9 | verification | WORD,USER | docu                 | 3.1743276 | WORD |
| 9 | verification | WORD,USER | double-pulse         | 3.1743276 | WORD |
| 9 | verification | WORD,USER | early-stage          | 3.1743276 | WORD |
| 9 | verification | WORD,USER | embarrassment        | 3.1743276 | WORD |
| 9 | verification | WORD,USER | empirical-strong     | 3.1743276 | WORD |
| 9 | verification | WORD,USER | empirical-weak       | 3.1743276 | WORD |
| 9 | verification | WORD,USER | extrapolations       | 3.1743276 | WORD |
| 9 | verification | WORD,USER | factorization        | 3.1743276 | WORD |
| 9 | verification | WORD,USER | ff                   | 3.1743276 | WORD |
| 9 | verification | WORD,USER | fies                 | 3.1743276 | WORD |
| 9 | verification | WORD,USER | furthering           | 3.1743276 | WORD |
| 9 | verification | WORD,USER | garrison             | 3.1743276 | WORD |
| 9 | verification | WORD,USER | girder               | 3.1743276 | WORD |
| 9 | verification | WORD,USER | government-supported | 3.1743276 | WORD |
| 9 | verification | WORD,USER | graded               | 3.1743276 | WORD |
| 9 | verification | WORD,USER | guidebook            | 3.1743276 | WORD |
| 9 | verification | WORD,USER | hyperbolic           | 3.1743276 | WORD |
| 9 | verification | WORD,USER | inanimate            | 3.1743276 | WORD |
| 9 | verification | WORD,USER | inexactness          | 3.1743276 | WORD |
| 9 | verification | WORD,USER | ings                 | 3.1743276 | WORD |
| 9 | verification | WORD,USER | insects              | 3.1743276 | WORD |
| 9 | verification | WORD,USER | interoperated        | 3.1743276 | WORD |
| 9 | verification | WORD,USER | investor             | 3.1743276 | WORD |

|   |              |           |                     |           |      |
|---|--------------|-----------|---------------------|-----------|------|
| 9 | verification | WORD,USER | kilobytes           | 3.1743276 | WORD |
| 9 | verification | WORD,USER | levies              | 3.1743276 | WORD |
| 9 | verification | WORD,USER | location-aware      | 3.1743276 | WORD |
| 9 | verification | WORD,USER | loom                | 3.1743276 | WORD |
| 9 | verification | WORD,USER | materialhandling    | 3.1743276 | WORD |
| 9 | verification | WORD,USER | member-task         | 3.1743276 | WORD |
| 9 | verification | WORD,USER | micro-world         | 3.1743276 | WORD |
| 9 | verification | WORD,USER | microhydro          | 3.1743276 | WORD |
| 9 | verification | WORD,USER | misconception       | 3.1743276 | WORD |
| 9 | verification | WORD,USER | mobilized           | 3.1743276 | WORD |
| 9 | verification | WORD,USER | model-making        | 3.1743276 | WORD |
| 9 | verification | WORD,USER | nickname            | 3.1743276 | WORD |
| 9 | verification | WORD,USER | non-repeatable      | 3.1743276 | WORD |
| 9 | verification | WORD,USER | notoriously         | 3.1743276 | WORD |
| 9 | verification | WORD,USER | participatory-based | 3.1743276 | WORD |
| 9 | verification | WORD,USER | persuaded           | 3.1743276 | WORD |
| 9 | verification | WORD,USER | pervades            | 3.1743276 | WORD |
| 9 | verification | WORD,USER | philosopher         | 3.1743276 | WORD |
| 9 | verification | WORD,USER | planing             | 3.1743276 | WORD |
| 9 | verification | WORD,USER | polyline            | 3.1743276 | WORD |
| 9 | verification | WORD,USER | postmortem          | 3.1743276 | WORD |
| 9 | verification | WORD,USER | praised             | 3.1743276 | WORD |
| 9 | verification | WORD,USER | preoccupation       | 3.1743276 | WORD |
| 9 | verification | WORD,USER | quietly             | 3.1743276 | WORD |
| 9 | verification | WORD,USER | real-system         | 3.1743276 | WORD |
| 9 | verification | WORD,USER | recertification     | 3.1743276 | WORD |
| 9 | verification | WORD,USER | regaining           | 3.1743276 | WORD |
| 9 | verification | WORD,USER | releasable          | 3.1743276 | WORD |
| 9 | verification | WORD,USER | retirements         | 3.1743276 | WORD |
| 9 | verification | WORD,USER | reuser              | 3.1743276 | WORD |
| 9 | verification | WORD,USER | sanctioning         | 3.1743276 | WORD |
| 9 | verification | WORD,USER | sandpapering        | 3.1743276 | WORD |
| 9 | verification | WORD,USER | seg                 | 3.1743276 | WORD |
| 9 | verification | WORD,USER | semantical          | 3.1743276 | WORD |
| 9 | verification | WORD,USER | semi-formal         | 3.1743276 | WORD |
| 9 | verification | WORD,USER | specialisations     | 3.1743276 | WORD |
| 9 | verification | WORD,USER | speculated          | 3.1743276 | WORD |
| 9 | verification | WORD,USER | spin-off            | 3.1743276 | WORD |



|                   |              |             |                       |              |              |
|-------------------|--------------|-------------|-----------------------|--------------|--------------|
| 9                 | verification | WORD,USER   | standpoints           | 3.1743276    | WORD         |
| 9                 | verification | WORD,USER   | starter               | 3.1743276    | WORD         |
| 9                 | verification | WORD,USER   | structural-strong     | 3.1743276    | WORD         |
| 9                 | verification | WORD,USER   | structure-oriented    | 3.1743276    | WORD         |
| 9                 | verification | WORD,USER   | supposition           | 3.1743276    | WORD         |
| 9                 | verification | WORD,USER   | surrounds             | 3.1743276    | WORD         |
| 9                 | verification | WORD,USER   | system-on-chip        | 3.1743276    | WORD         |
| 9                 | verification | WORD,USER   | tamper-detecting      | 3.1743276    | WORD         |
| 9                 | verification | WORD,USER   | to-be                 | 3.1743276    | WORD         |
| 9                 | verification | WORD,USER   | triangulating         | 3.1743276    | WORD         |
| 9                 | verification | WORD,USER   | trusting              | 3.1743276    | WORD         |
| 9                 | verification | WORD,USER   | typographic           | 3.1743276    | WORD         |
| 9                 | verification | WORD,USER   | user-adaptable        | 3.1743276    | WORD         |
| 9                 | verification | WORD,USER   | verbalise             | 3.1743276    | WORD         |
| 9                 | verification | WORD,USER   | verifier              | 3.1743276    | WORD         |
| 9                 | verification | WORD,USER   | voids                 | 3.1743276    | WORD         |
| 9                 | verification | WORD,USER   | waived                | 3.1743276    | WORD         |
| 9                 | verification | WORD,USER   | wine                  | 3.1743276    | WORD         |
| 9                 | verification | WORD,USER   | øn                    | 3.1743276    | WORD         |
| 9                 | verification | WORD,USER   | two-sample            | 2.8097959    | WORD         |
| 9                 | verification | WORD,USER   | project's             | 2.5187664    | WORD         |
| 9                 | verification | WORD,USER   | human-machine         | 2.312397     | WORD         |
| 9                 | verification | WORD,USER   | earnest               | 2.0216517    | WORD         |
| 9                 | verification | WORD,USER   | misuse                | 2.0216517    | WORD         |
| 9                 | verification | WORD,USER   | onsite                | 2.0216517    | WORD         |
| 9                 | verification | WORD,USER   | unstated              | 2.0216517    | WORD         |
|                   |              |             |                       |              |              |
|                   |              |             |                       |              |              |
| <b>2010s.</b>     |              |             |                       |              |              |
| <b>iterations</b> | <b>value</b> | <b>kind</b> | <b>word</b>           | <b>score</b> | <b>kind2</b> |
| 9                 | verification | WORD,USER   | verification          | 7.5837445    | WORD         |
| 9                 | verification | WORD,USER   | accreditation         | 6.0865097    | WORD         |
| 9                 | verification | WORD,USER   | statechart-assertions | 4.354145     | WORD         |
| 9                 | verification | WORD,USER   | respondent            | 4.234495     | WORD         |
| 9                 | verification | WORD,USER   | definitively          | 4.088172     | WORD         |
| 9                 | verification | WORD,USER   | time-constrained      | 4.088172     | WORD         |
| 9                 | verification | WORD,USER   | 35th                  | 3.8996813    | WORD         |
| 9                 | verification | WORD,USER   | afterthought          | 3.8996813    | WORD         |



|   |              |           |                      |           |      |
|---|--------------|-----------|----------------------|-----------|------|
| 9 | verification | WORD,USER | apt                  | 3.8996813 | WORD |
| 9 | verification | WORD,USER | culminates           | 3.8996813 | WORD |
| 9 | verification | WORD,USER | darker               | 3.8996813 | WORD |
| 9 | verification | WORD,USER | demise               | 3.8996813 | WORD |
| 9 | verification | WORD,USER | endgame              | 3.8996813 | WORD |
| 9 | verification | WORD,USER | entailment           | 3.8996813 | WORD |
| 9 | verification | WORD,USER | equaled              | 3.8996813 | WORD |
| 9 | verification | WORD,USER | execution-based      | 3.8996813 | WORD |
| 9 | verification | WORD,USER | explainable          | 3.8996813 | WORD |
| 9 | verification | WORD,USER | hides                | 3.8996813 | WORD |
| 9 | verification | WORD,USER | inter-agent          | 3.8996813 | WORD |
| 9 | verification | WORD,USER | locational           | 3.8996813 | WORD |
| 9 | verification | WORD,USER | mastering            | 3.8996813 | WORD |
| 9 | verification | WORD,USER | matrixes             | 3.8996813 | WORD |
| 9 | verification | WORD,USER | motive               | 3.8996813 | WORD |
| 9 | verification | WORD,USER | non-bottlenecks      | 3.8996813 | WORD |
| 9 | verification | WORD,USER | outweighed           | 3.8996813 | WORD |
| 9 | verification | WORD,USER | parameterisation     | 3.8996813 | WORD |
| 9 | verification | WORD,USER | proficient           | 3.8996813 | WORD |
| 9 | verification | WORD,USER | qua                  | 3.8996813 | WORD |
| 9 | verification | WORD,USER | re-create            | 3.8996813 | WORD |
| 9 | verification | WORD,USER | restarted            | 3.8996813 | WORD |
| 9 | verification | WORD,USER | specializes          | 3.8996813 | WORD |
| 9 | verification | WORD,USER | statechartassertions | 3.8996813 | WORD |
| 9 | verification | WORD,USER | stolen               | 3.8996813 | WORD |
| 9 | verification | WORD,USER | stressful            | 3.8996813 | WORD |
| 9 | verification | WORD,USER | tenuous              | 3.8996813 | WORD |
| 9 | verification | WORD,USER | 21th                 | 3.6342323 | WORD |
| 9 | verification | WORD,USER | 36th                 | 3.6342323 | WORD |
| 9 | verification | WORD,USER | abduction            | 3.6342323 | WORD |
| 9 | verification | WORD,USER | common-sense         | 3.6342323 | WORD |
| 9 | verification | WORD,USER | critic               | 3.6342323 | WORD |
| 9 | verification | WORD,USER | crunch               | 3.6342323 | WORD |
| 9 | verification | WORD,USER | delve                | 3.6342323 | WORD |
| 9 | verification | WORD,USER | elaborations         | 3.6342323 | WORD |
| 9 | verification | WORD,USER | encumbered           | 3.6342323 | WORD |
| 9 | verification | WORD,USER | endoscopic           | 3.6342323 | WORD |
| 9 | verification | WORD,USER | evidence-driven      | 3.6342323 | WORD |

|   |              |           |                |           |      |
|---|--------------|-----------|----------------|-----------|------|
| 9 | verification | WORD,USER | examin         | 3.6342323 | WORD |
| 9 | verification | WORD,USER | excerpts       | 3.6342323 | WORD |
| 9 | verification | WORD,USER | expressible    | 3.6342323 | WORD |
| 9 | verification | WORD,USER | facial         | 3.6342323 | WORD |
| 9 | verification | WORD,USER | flowtime       | 3.6342323 | WORD |
| 9 | verification | WORD,USER | foray          | 3.6342323 | WORD |
| 9 | verification | WORD,USER | fraught        | 3.6342323 | WORD |
| 9 | verification | WORD,USER | fullest        | 3.6342323 | WORD |
| 9 | verification | WORD,USER | grammars       | 3.6342323 | WORD |
| 9 | verification | WORD,USER | guise          | 3.6342323 | WORD |
| 9 | verification | WORD,USER | hig            | 3.6342323 | WORD |
| 9 | verification | WORD,USER | human-induced  | 3.6342323 | WORD |
| 9 | verification | WORD,USER | impediment     | 3.6342323 | WORD |
| 9 | verification | WORD,USER | implausible    | 3.6342323 | WORD |
| 9 | verification | WORD,USER | inaccessible   | 3.6342323 | WORD |
| 9 | verification | WORD,USER | inexpensively  | 3.6342323 | WORD |
| 9 | verification | WORD,USER | inscriptions   | 3.6342323 | WORD |
| 9 | verification | WORD,USER | inter-system   | 3.6342323 | WORD |
| 9 | verification | WORD,USER | interviewer    | 3.6342323 | WORD |
| 9 | verification | WORD,USER | literal        | 3.6342323 | WORD |
| 9 | verification | WORD,USER | lunches        | 3.6342323 | WORD |
| 9 | verification | WORD,USER | methodical     | 3.6342323 | WORD |
| 9 | verification | WORD,USER | negated        | 3.6342323 | WORD |
| 9 | verification | WORD,USER | nnection       | 3.6342323 | WORD |
| 9 | verification | WORD,USER | non-simulation | 3.6342323 | WORD |
| 9 | verification | WORD,USER | out-of-sample  | 3.6342323 | WORD |
| 9 | verification | WORD,USER | painstaking    | 3.6342323 | WORD |
| 9 | verification | WORD,USER | persisting     | 3.6342323 | WORD |
| 9 | verification | WORD,USER | precursors     | 3.6342323 | WORD |
| 9 | verification | WORD,USER | preparers      | 3.6342323 | WORD |
| 9 | verification | WORD,USER | preselected    | 3.6342323 | WORD |
| 9 | verification | WORD,USER | professions    | 3.6342323 | WORD |
| 9 | verification | WORD,USER | profitably     | 3.6342323 | WORD |
| 9 | verification | WORD,USER | quickness      | 3.6342323 | WORD |
| 9 | verification | WORD,USER | refugees       | 3.6342323 | WORD |
| 9 | verification | WORD,USER | rumor          | 3.6342323 | WORD |
| 9 | verification | WORD,USER | rumors         | 3.6342323 | WORD |
| 9 | verification | WORD,USER | stepby-step    | 3.6342323 | WORD |

|   |              |           |                   |           |      |
|---|--------------|-----------|-------------------|-----------|------|
| 9 | verification | WORD,USER | subject-matter    | 3.6342323 | WORD |
| 9 | verification | WORD,USER | superposed        | 3.6342323 | WORD |
| 9 | verification | WORD,USER | systemof-systems  | 3.6342323 | WORD |
| 9 | verification | WORD,USER | theo              | 3.6342323 | WORD |
| 9 | verification | WORD,USER | threatened        | 3.6342323 | WORD |
| 9 | verification | WORD,USER | tremendously      | 3.6342323 | WORD |
| 9 | verification | WORD,USER | unaltered         | 3.6342323 | WORD |
| 9 | verification | WORD,USER | unauthorized      | 3.6342323 | WORD |
| 9 | verification | WORD,USER | undue             | 3.6342323 | WORD |
| 9 | verification | WORD,USER | unverified        | 3.6342323 | WORD |
| 9 | verification | WORD,USER | wife              | 3.6342323 | WORD |
| 9 | verification | WORD,USER | wound             | 3.6342323 | WORD |
| 9 | verification | WORD,USER | ablation          | 3.1808145 | WORD |
| 9 | verification | WORD,USER | advantageously    | 3.1808145 | WORD |
| 9 | verification | WORD,USER | airway            | 3.1808145 | WORD |
| 9 | verification | WORD,USER | alidation         | 3.1808145 | WORD |
| 9 | verification | WORD,USER | alysis            | 3.1808145 | WORD |
| 9 | verification | WORD,USER | anal              | 3.1808145 | WORD |
| 9 | verification | WORD,USER | ansson            | 3.1808145 | WORD |
| 9 | verification | WORD,USER | archaeology       | 3.1808145 | WORD |
| 9 | verification | WORD,USER | argmax            | 3.1808145 | WORD |
| 9 | verification | WORD,USER | axiom             | 3.1808145 | WORD |
| 9 | verification | WORD,USER | beginner          | 3.1808145 | WORD |
| 9 | verification | WORD,USER | bleeding          | 3.1808145 | WORD |
| 9 | verification | WORD,USER | boys              | 3.1808145 | WORD |
| 9 | verification | WORD,USER | cadaver           | 3.1808145 | WORD |
| 9 | verification | WORD,USER | case-studies      | 3.1808145 | WORD |
| 9 | verification | WORD,USER | circumvent        | 3.1808145 | WORD |
| 9 | verification | WORD,USER | clashes           | 3.1808145 | WORD |
| 9 | verification | WORD,USER | codecs            | 3.1808145 | WORD |
| 9 | verification | WORD,USER | code's            | 3.1808145 | WORD |
| 9 | verification | WORD,USER | community's       | 3.1808145 | WORD |
| 9 | verification | WORD,USER | computerised      | 3.1808145 | WORD |
| 9 | verification | WORD,USER | decision-oriented | 3.1808145 | WORD |
| 9 | verification | WORD,USER | designtime        | 3.1808145 | WORD |
| 9 | verification | WORD,USER | drill-down        | 3.1808145 | WORD |
| 9 | verification | WORD,USER | du                | 3.1808145 | WORD |
| 9 | verification | WORD,USER | eldwork           | 3.1808145 | WORD |

|   |              |           |                 |           |      |
|---|--------------|-----------|-----------------|-----------|------|
| 9 | verification | WORD,USER | excuse          | 3.1808145 | WORD |
| 9 | verification | WORD,USER | fax             | 3.1808145 | WORD |
| 9 | verification | WORD,USER | form-finding    | 3.1808145 | WORD |
| 9 | verification | WORD,USER | gh              | 3.1808145 | WORD |
| 9 | verification | WORD,USER | guidewords      | 3.1808145 | WORD |
| 9 | verification | WORD,USER | heavyweight     | 3.1808145 | WORD |
| 9 | verification | WORD,USER | heel            | 3.1808145 | WORD |
| 9 | verification | WORD,USER | humble          | 3.1808145 | WORD |
| 9 | verification | WORD,USER | hungry          | 3.1808145 | WORD |
| 9 | verification | WORD,USER | illuminates     | 3.1808145 | WORD |
| 9 | verification | WORD,USER | intra-agent     | 3.1808145 | WORD |
| 9 | verification | WORD,USER | invertng        | 3.1808145 | WORD |
| 9 | verification | WORD,USER | minimalist      | 3.1808145 | WORD |
| 9 | verification | WORD,USER | mock-ups        | 3.1808145 | WORD |
| 9 | verification | WORD,USER | modifica        | 3.1808145 | WORD |
| 9 | verification | WORD,USER | ngineering      | 3.1808145 | WORD |
| 9 | verification | WORD,USER | non-ground      | 3.1808145 | WORD |
| 9 | verification | WORD,USER | obstruction     | 3.1808145 | WORD |
| 9 | verification | WORD,USER | onveyor         | 3.1808145 | WORD |
| 9 | verification | WORD,USER | ories           | 3.1808145 | WORD |
| 9 | verification | WORD,USER | p-t             | 3.1808145 | WORD |
| 9 | verification | WORD,USER | person's        | 3.1808145 | WORD |
| 9 | verification | WORD,USER | prefabrication  | 3.1808145 | WORD |
| 9 | verification | WORD,USER | prospected      | 3.1808145 | WORD |
| 9 | verification | WORD,USER | pubs            | 3.1808145 | WORD |
| 9 | verification | WORD,USER | raining         | 3.1808145 | WORD |
| 9 | verification | WORD,USER | re-implementing | 3.1808145 | WORD |
| 9 | verification | WORD,USER | recreates       | 3.1808145 | WORD |
| 9 | verification | WORD,USER | retractions     | 3.1808145 | WORD |
| 9 | verification | WORD,USER | revalidated     | 3.1808145 | WORD |
| 9 | verification | WORD,USER | satisfiability  | 3.1808145 | WORD |
| 9 | verification | WORD,USER | scale-model     | 3.1808145 | WORD |
| 9 | verification | WORD,USER | sectarian       | 3.1808145 | WORD |
| 9 | verification | WORD,USER | shining         | 3.1808145 | WORD |
| 9 | verification | WORD,USER | simulati        | 3.1808145 | WORD |
| 9 | verification | WORD,USER | ster            | 3.1808145 | WORD |
| 9 | verification | WORD,USER | tan             | 3.1808145 | WORD |
| 9 | verification | WORD,USER | testament       | 3.1808145 | WORD |

|   |              |           |                       |           |      |
|---|--------------|-----------|-----------------------|-----------|------|
| 9 | verification | WORD,USER | theaters              | 3.1808145 | WORD |
| 9 | verification | WORD,USER | trace-driven          | 3.1808145 | WORD |
| 9 | verification | WORD,USER | trusts                | 3.1808145 | WORD |
| 9 | verification | WORD,USER | upper-level           | 3.1808145 | WORD |
| 9 | verification | WORD,USER | ust                   | 3.1808145 | WORD |
| 9 | verification | WORD,USER | veterans              | 3.1808145 | WORD |
| 9 | verification | WORD,USER | well-studied          | 3.1808145 | WORD |
| 9 | verification | WORD,USER | verifiable            | 2.9508884 | WORD |
| 9 | verification | WORD,USER | cognitively           | 2.8496442 | WORD |
| 9 | verification | WORD,USER | rightly               | 2.729994  | WORD |
| 9 | verification | WORD,USER | substantiation        | 2.729994  | WORD |
| 9 | verification | WORD,USER | enlightening          | 2.5836713 | WORD |
| 9 | verification | WORD,USER | near-term             | 2.5836713 | WORD |
| 9 | verification | WORD,USER | testers               | 2.39518   | WORD |
| 9 | verification | WORD,USER | validations           | 2.39518   | WORD |
| 9 | verification | WORD,USER | zsignal               | 2.39518   | WORD |
| 9 | verification | WORD,USER | breed                 | 2.129731  | WORD |
| 9 | verification | WORD,USER | changer               | 2.129731  | WORD |
| 9 | verification | WORD,USER | code-to-model         | 2.129731  | WORD |
| 9 | verification | WORD,USER | coupon                | 2.129731  | WORD |
| 9 | verification | WORD,USER | demo                  | 2.129731  | WORD |
| 9 | verification | WORD,USER | emphasise             | 2.129731  | WORD |
| 9 | verification | WORD,USER | expedition            | 2.129731  | WORD |
| 9 | verification | WORD,USER | hypothetico-deductive | 2.129731  | WORD |
| 9 | verification | WORD,USER | lenders               | 2.129731  | WORD |
| 9 | verification | WORD,USER | listen                | 2.129731  | WORD |
| 9 | verification | WORD,USER | nights                | 2.129731  | WORD |
| 9 | verification | WORD,USER | opt                   | 2.129731  | WORD |
| 9 | verification | WORD,USER | pink                  | 2.129731  | WORD |
| 9 | verification | WORD,USER | refugee               | 2.129731  | WORD |
| 9 | verification | WORD,USER | source-code           | 2.129731  | WORD |
